# Supplementary material
Source: Research Square preprint supplement (doi:10.21203/rs.3.rs-10059626/v1)
Supplement: Supplementary file 1 [file 9aeec6aea1fb8c876c615985.xlsx]

## Sheet: Supplement Table S1 Motivation
	*Estimate of U16 men by Match 1
		Fixed effects – effective intrinsic						Fixed effects – cognitive intrinsic
	Fixed effects – effective intrinsic	estimate	lower.CL	upper.CL	p.value		Fixed effects – cognitive intrinsic	estimate	lower.CL	upper.CL	p.value
	Intercept*	4.371	3.675	5.063	<0.001		Intercept*	5.114	4.433	5.791	<0.001
	Match 2	0.101	-0.429	0.630	0.725		Match 2	-0.085	-0.622	0.452	0.770
	Match 3	-0.294	-0.847	0.260	0.327		Match 3	-0.137	-0.699	0.424	0.651
	Match 4	0.521	-0.032	1.075	0.083		Match 4	0.087	-0.473	0.648	0.774
	Match 5	0.510	-0.044	1.065	0.090		Match 5	-0.314	-0.876	0.248	0.302
	Match 6	0.180	-0.376	0.737	0.549		Match 6	-0.473	-1.036	0.090	0.122
	team U18	0.597	-0.367	1.563	0.243		team U18	0.106	-0.839	1.052	0.833
	women	0.560	-0.434	1.552	0.288		women	-0.173	-1.152	0.794	0.737
	Match 2: team U18	-0.210	-0.960	0.542	0.606		Match 2: team U18	0.048	-0.713	0.809	0.908
	Match 3: team U18	0.618	-0.188	1.426	0.158		Match 3: team U18	0.511	-0.306	1.331	0.249
	Match 4: team U18	-0.758	-1.529	0.014	0.071		Match 4: team U18	0.086	-0.695	0.869	0.839
	Match 5: team U18	-0.795	-1.557	-0.031	0.056		Match 5: team U18	-0.265	-1.038	0.509	0.527
	Match 6: team U18	-0.437	-1.236	0.364	0.313		Match 6: team U18	0.201	-0.608	1.013	0.646
	Match 2: women	-0.308	-1.187	0.572	0.517		Match 2: women	0.228	-0.657	1.122	0.634
	Match 3: women	0.260	-0.668	1.190	0.604		Match 3: women	0.112	-0.823	1.057	0.825
	Match 4: women	-0.473	-1.372	0.425	0.330		Match 4: women	0.034	-0.871	0.947	0.945
	Match 5: women	-0.461	-1.463	0.543	0.395		Match 5: women	0.681	-0.329	1.702	0.214
	Match 6: women	-0.313	-1.222	0.595	0.524		Match 6: women	0.662	-0.254	1.584	0.183
	team U18: women	-0.520	-1.935	0.900	0.489		team U18: women	-0.042	-1.425	1.354	0.954
	Match 2: team U18: women	0.355	-0.828	1.538	0.579		Match 2: team U18: women	-0.591	-1.791	0.604	0.362
	Match 3: team U18: women	-0.744	-2.000	0.507	0.273		Match 3: team U18: women	-0.281	-1.558	0.983	0.681
	Match 4: team U18: women	0.528	-0.674	1.725	0.416		Match 4: team U18: women	-0.226	-1.447	0.985	0.731
	Match 5: team U18: women	0.041	-1.236	1.312	0.953		Match 5: team U18: women	-0.601	-1.898	0.684	0.389
	Match 6: team U18: women	0.461	-0.775	1.699	0.490		Match 6: team U18: women	-0.671	-1.925	0.579	0.322
		Fixed effects – integrated						Fixed effects – identified
	Fixed effects – integrated	estimate	lower.CL	upper.CL	p.value		Fixed effects – identified	estimate	lower.CL	upper.CL	p.value
	Intercept*	4.605	3.920	5.284	<0.001		Intercept*	4.909	4.274	5.538	<0.001
	Match 2	0.145	-0.534	0.825	0.693		Match 2	-0.169	-0.760	0.423	0.596
	Match 3	0.091	-0.619	0.802	0.812		Match 3	0.124	-0.494	0.743	0.711
	Match 4	0.481	-0.226	1.190	0.209		Match 4	0.171	-0.445	0.789	0.608
	Match 5	0.183	-0.525	0.894	0.633		Match 5	0.085	-0.531	0.705	0.798
	Match 6	0.045	-0.665	0.754	0.907		Match 6	-0.195	-0.814	0.424	0.559
	team U18	0.855	-0.105	1.809	0.095		team U18	0.265	-0.621	1.147	0.574
	women	0.037	-0.954	1.019	0.944		women	-0.173	-1.087	0.736	0.721
	Match 2: team U18	-0.581	-1.541	0.380	0.264		Match 2: team U18	0.313	-0.524	1.150	0.489
	Match 3: team U18	0.077	-0.959	1.117	0.890		Match 3: team U18	0.197	-0.705	1.101	0.687
	Match 4: team U18	-0.847	-1.836	0.143	0.114		Match 4: team U18	-0.173	-1.034	0.689	0.710
	Match 5: team U18	-0.785	-1.764	0.194	0.139		Match 5: team U18	-0.780	-1.632	0.072	0.092
	Match 6: team U18	-0.186	-1.207	0.839	0.736		Match 6: team U18	-0.073	-0.963	0.821	0.879
	Match 2: women	0.086	-1.012	1.182	0.884		Match 2: women	0.310	-0.652	1.272	0.550
	Match 3: women	0.170	-0.983	1.329	0.785		Match 3: women	0.164	-0.854	1.176	0.765
	Match 4: women	0.120	-1.002	1.237	0.842		Match 4: women	0.105	-0.880	1.086	0.842
	Match 5: women	0.033	-1.214	1.280	0.960		Match 5: women	0.499	-0.597	1.594	0.399
	Match 6: women	0.079	-1.058	1.213	0.897		Match 6: women	0.612	-0.387	1.606	0.256
	team U18: women	-0.467	-1.867	0.956	0.535		team U18: women	0.093	-1.202	1.403	0.894
	Match 2: team U18: women	0.146	-1.348	1.641	0.856		Match 2: team U18: women	-0.720	-2.026	0.587	0.308
	Match 3: team U18: women	-0.840	-2.431	0.738	0.326		Match 3: team U18: women	-0.329	-1.713	1.053	0.659
	Match 4: team U18: women	0.240	-1.278	1.757	0.770		Match 4: team U18: women	-0.273	-1.600	1.052	0.703
	Match 5: team U18: women	0.366	-1.241	1.970	0.673		Match 5: team U18: women	-0.559	-1.964	0.845	0.462
	Match 6: team U18: women	-0.209	-1.771	1.352	0.804		Match 6: team U18: women	-0.686	-2.052	0.680	0.353
		Fixed effects – introjected						Fixed effects – introjected
	Fixed effects – introjected	estimate	lower.CL	upper.CL	p.value		Fixed effects – external	estimate	lower.CL	upper.CL	p.value
	Intercept*	4.273	3.617	4.921	<0.001		Intercept*	2.006	1.429	2.580	<0.001
	Match 2	0.095	-0.550	0.742	0.785		Match 2	0.409	-0.157	0.979	0.183
	Match 3	-0.033	-0.708	0.643	0.927		Match 3	0.141	-0.452	0.735	0.660
	Match 4	0.323	-0.349	0.997	0.375		Match 4	0.327	-0.262	0.922	0.306
	Match 5	-0.189	-0.862	0.488	0.604		Match 5	0.693	0.102	1.289	0.031
	Match 6	0.106	-0.569	0.781	0.770		Match 6	0.334	-0.259	0.926	0.298
	team U18	1.157	0.245	2.073	0.019		team U18	-0.028	-0.830	0.783	0.949
	women	-0.146	-1.084	0.800	0.771		women	0.500	-0.327	1.337	0.260
	Match 2: team U18	-0.826	-1.740	0.087	0.095		Match 2: team U18	-0.224	-1.029	0.577	0.606
	Match 3: team U18	-0.745	-1.732	0.241	0.163		Match 3: team U18	0.331	-0.535	1.197	0.479
	Match 4: team U18	-1.210	-2.151	-0.269	0.018		Match 4: team U18	-0.263	-1.095	0.563	0.557
	Match 5: team U18	-0.709	-1.641	0.221	0.160		Match 5: team U18	-0.586	-1.410	0.230	0.185
	Match 6: team U18	-1.225	-2.197	-0.253	0.021		Match 6: team U18	-0.244	-1.100	0.609	0.597
	Match 2: women	-0.627	-1.671	0.416	0.266		Match 2: women	-0.787	-1.706	0.129	0.113
	Match 3: women	0.331	-0.772	1.427	0.577		Match 3: women	0.098	-0.872	1.062	0.850
	Match 4: women	0.130	-0.934	1.196	0.821		Match 4: women	0.148	-0.789	1.083	0.769
	Match 5: women	0.295	-0.892	1.482	0.645		Match 5: women	-0.878	-1.923	0.163	0.120
	Match 6: women	0.218	-0.861	1.301	0.709		Match 6: women	0.151	-0.796	1.103	0.768
	team U18: women	-1.361	-2.713	-0.019	0.060		team U18: women	-0.813	-2.010	0.369	0.201
	Match 2: team U18: women	0.998	-0.423	2.420	0.194		Match 2: team U18: women	0.716	-0.530	1.968	0.289
	Match 3: team U18: women	0.683	-0.819	2.190	0.401		Match 3: team U18: women	-0.183	-1.502	1.142	0.797
	Match 4: team U18: women	0.732	-0.715	2.173	0.348		Match 4: team U18: women	0.026	-1.239	1.299	0.969
	Match 5: team U18: women	-0.207	-1.736	1.319	0.802		Match 5: team U18: women	1.414	0.075	2.760	0.052
	Match 6: team U18: women	0.338	-1.148	1.822	0.674		Match 6: team U18: women	0.433	-0.872	1.738	0.539
		Fixed effects – amotivation
	Fixed effects – amotivation	estimate	lower.CL	upper.CL	p.value
	Intercept*	1.187	0.580	1.794	<0.001
	Match 2	0.117	-0.440	0.673	0.698
	Match 3	0.198	-0.384	0.780	0.528
	Match 4	0.204	-0.377	0.784	0.516
	Match 5	0.368	-0.214	0.950	0.243
	Match 6	0.210	-0.372	0.793	0.505
	team U18	0.271	-0.577	1.121	0.548
	women	0.968	0.096	1.846	0.039
	Match 2: team U18	0.513	-0.274	1.302	0.229
	Match 3: team U18	0.408	-0.440	1.259	0.375
	Match 4: team U18	0.064	-0.747	0.875	0.883
	Match 5: team U18	0.160	-0.641	0.964	0.712
	Match 6: team U18	0.142	-0.696	0.983	0.754
	Match 2: women	-0.234	-1.141	0.675	0.634
	Match 3: women	0.166	-0.794	1.122	0.748
	Match 4: women	0.241	-0.686	1.169	0.630
	Match 5: women	-0.577	-1.611	0.457	0.302
	Match 6: women	0.201	-0.738	1.142	0.692
	team U18: women	-0.555	-1.813	0.689	0.405
	Match 2: team U18: women	0.271	-0.961	1.502	0.684
	Match 3: team U18: women	-0.892	-2.194	0.415	0.206
	Match 4: team U18: women	-0.124	-1.373	1.127	0.854
	Match 5: team U18: women	0.386	-0.939	1.710	0.590
	Match 6: team U18: women	-0.586	-1.876	0.699	0.399

## Sheet: Supplement Table S1 Metabolites
	*Estimate of U16 men before Match 1
		Fixed effects – Creatinine						Fixed effects – An
	Fixed effects – Creatinine	estimate	lower.CL	upper.CL	p.value		Fixed effects – An	estimate	lower.CL	upper.CL	p.value
	Intercept*	9.282	9.047	9.516	<0.001		Intercept*	-7.357	-7.564	-7.151	<0.001
	Match 2	-0.083	-0.275	0.111	0.409		Match 2	-0.158	-0.313	-0.003	0.050
	Match 3	-0.063	-0.266	0.141	0.552		Match 3	-0.120	-0.282	0.042	0.152
	Match 4	-0.122	-0.315	0.071	0.223		Match 4	-0.480	-0.635	-0.327	<0.001
	Match 5	-0.021	-0.219	0.179	0.836		Match 5	-0.296	-0.455	-0.139	<0.001
	Match 6	0.020	-0.181	0.220	0.848		Match 6	-0.457	-0.617	-0.297	<0.001
	after Match	0.557	0.373	0.742	<0.001		after Match	-0.349	-0.503	-0.197	<0.001
	team U18	0.069	-0.209	0.347	0.635		team U18	0.366	0.113	0.619	0.007
	women	-0.080	-0.381	0.222	0.611		women	-0.118	-0.389	0.153	0.403
	after Match: team U18	0.164	-0.102	0.431	0.231		after Match: team U18	-0.140	-0.360	0.081	0.218
	after Match: women	-0.119	-0.414	0.175	0.431		after Match: women	0.192	-0.054	0.436	0.127
	team U18: women	-0.059	-0.480	0.362	0.790		team U18: women	0.074	-0.306	0.455	0.710
	after Match: team U18: women	0.030	-0.378	0.436	0.885		after Match: team U18: women	-0.103	-0.441	0.235	0.554
		Fixed effects – Et						Fixed effects – DHEA
	Fixed effects – Et	estimate	lower.CL	upper.CL	p.value		Fixed effects – DHEA	estimate	lower.CL	upper.CL	p.value
	Intercept*	-8.036	-8.282	-7.791	<0.001		Intercept*	-9.802	-10.267	-9.337	<0.001
	Match 2	-0.158	-0.333	0.018	0.082		Match 2	-0.163	-0.410	0.086	0.205
	Match 3	-0.158	-0.340	0.027	0.097		Match 3	-0.165	-0.423	0.095	0.217
	Match 4	-0.581	-0.755	-0.406	<0.001		Match 4	-0.262	-0.507	-0.016	0.040
	Match 5	-0.326	-0.505	-0.147	<0.001		Match 5	-0.180	-0.432	0.072	0.166
	Match 6	-0.437	-0.616	-0.252	<0.001		Match 6	-0.210	-0.464	0.051	0.114
	after Match	-0.354	-0.510	-0.198	<0.001		after Match	-0.551	-0.775	-0.326	<0.001
	team U18	0.403	0.099	0.707	0.013		team U18	0.814	0.208	1.421	0.012
	women	0.320	-0.002	0.642	0.060		women	0.352	-0.274	0.979	0.282
	after Match: team U18	-0.090	-0.316	0.135	0.438		after Match: team U18	-0.501	-0.826	-0.179	0.003
	after Match: women	0.233	-0.018	0.482	0.070		after Match: women	0.377	0.016	0.735	0.042
	team U18: women	0.135	-0.319	0.590	0.569		team U18: women	-0.054	-0.945	0.839	0.907
	after Match: team U18: women	-0.130	-0.474	0.217	0.465		after Match: team U18: women	-0.085	-0.580	0.412	0.738
		Fixed effects – 11OHAn						Fixed effects – 11OHEt
	Fixed effects – 11OHAn	estimate	lower.CL	upper.CL	p.value		Fixed effects – 11OHEt	estimate	lower.CL	upper.CL	p.value
	Intercept*	-8.540	-8.739	-8.341	<0.001		Intercept*	-9.821	-10.149	-9.493	<0.001
	Match 2	-0.261	-0.447	-0.072	0.008		Match 2	-0.272	-0.493	-0.046	0.019
	Match 3	-0.290	-0.486	-0.094	0.005		Match 3	-0.290	-0.523	-0.058	0.017
	Match 4	-0.957	-1.145	-0.770	<0.001		Match 4	-0.848	-1.069	-0.625	<0.001
	Match 5	-0.686	-0.879	-0.494	<0.001		Match 5	-0.633	-0.859	-0.403	<0.001
	Match 6	-0.754	-0.945	-0.560	<0.001		Match 6	-0.705	-0.933	-0.471	<0.001
	after Match	-0.327	-0.491	-0.163	<0.001		after Match	-0.359	-0.522	-0.197	<0.001
	team U18	0.227	0.004	0.449	0.054		team U18	0.310	-0.100	0.721	0.151
	women	0.208	-0.037	0.454	0.106		women	0.099	-0.331	0.529	0.660
	after Match: team U18	-0.073	-0.309	0.163	0.545		after Match: team U18	0.015	-0.220	0.249	0.902
	after Match: women	0.269	0.007	0.530	0.046		after Match: women	0.232	-0.027	0.492	0.083
	team U18: women	0.036	-0.305	0.377	0.838		team U18: women	0.175	-0.435	0.785	0.584
	after Match: team U18: women	-0.195	-0.557	0.167	0.294		after Match: team U18: women	-0.281	-0.640	0.077	0.127
		Fixed effects – 16OHDHEA						Fixed effects – PD
	Fixed effects – 16OHDHEA	estimate	lower.CL	upper.CL	p.value		Fixed effects – PD	estimate	lower.CL	upper.CL	p.value
	Intercept*	-10.541	-10.810	-10.271	<0.001		Intercept*	-10.367	-10.648	-10.086	<0.001
	Match 2	0.033	-0.150	0.216	0.724		Match 2	0.043	-0.174	0.261	0.702
	Match 3	-0.004	-0.193	0.188	0.971		Match 3	-0.107	-0.333	0.121	0.362
	Match 4	-0.046	-0.227	0.137	0.621		Match 4	-0.311	-0.527	-0.094	0.006
	Match 5	-0.193	-0.379	-0.006	0.046		Match 5	-0.146	-0.368	0.076	0.204
	Match 6	-0.076	-0.263	0.116	0.435		Match 6	-0.260	-0.483	-0.036	0.025
	after Match	-0.694	-0.857	-0.531	<0.001		after Match	-0.385	-0.551	-0.221	<0.001
	team U18	0.513	0.175	0.850	0.005		team U18	0.226	-0.113	0.566	0.204
	women	0.357	0.000	0.713	0.057		women	0.742	0.379	1.103	<0.001
	after Match: team U18	-0.235	-0.470	0.000	0.053		after Match: team U18	-0.059	-0.295	0.180	0.631
	after Match: women	0.314	0.052	0.574	0.020		after Match: women	0.080	-0.183	0.344	0.554
	team U18: women	-0.041	-0.544	0.466	0.876		team U18: women	0.058	-0.451	0.568	0.827
	after Match: team U18: women	-0.034	-0.394	0.327	0.856		after Match: team U18: women	-0.197	-0.561	0.166	0.291
		Fixed effects – PT						Fixed effects – d5PD
	Fixed effects – PT	estimate	lower.CL	upper.CL	p.value		Fixed effects – d5PD	estimate	lower.CL	upper.CL	p.value
	Intercept*	-9.051	-9.271	-8.830	<0.001		Intercept*	-10.502	-10.769	-10.234	<0.001
	Match 2	-0.040	-0.201	0.121	0.633		Match 2	-0.174	-0.375	0.027	0.094
	Match 3	-0.189	-0.356	-0.020	0.030		Match 3	-0.033	-0.243	0.181	0.759
	Match 4	-0.720	-0.879	-0.560	<0.001		Match 4	-0.059	-0.261	0.145	0.574
	Match 5	-0.452	-0.616	-0.288	<0.001		Match 5	-0.143	-0.351	0.066	0.187
	Match 6	-0.606	-0.771	-0.439	<0.001		Match 6	-0.115	-0.324	0.097	0.292
	after Match	-0.268	-0.420	-0.118	<0.001		after Match	-0.680	-0.866	-0.495	<0.001
	team U18	0.378	0.105	0.650	0.010		team U18	0.180	-0.145	0.505	0.289
	women	0.033	-0.257	0.322	0.828		women	-0.457	-0.803	-0.111	0.013
	after Match: team U18	-0.075	-0.293	0.142	0.502		after Match: team U18	0.040	-0.225	0.307	0.768
	after Match: women	0.233	-0.008	0.475	0.060		after Match: women	0.563	0.267	0.858	<0.001
	team U18: women	0.061	-0.347	0.471	0.773		team U18: women	0.244	-0.243	0.733	0.339
	after Match: team U18: women	-0.167	-0.499	0.167	0.330		after Match: team U18: women	-0.414	-0.821	-0.005	0.049
		Fixed effects – d5AT						Fixed effects – THS
	Fixed effects – d5AT	estimate	lower.CL	upper.CL	p.value		Fixed effects – THS	estimate	lower.CL	upper.CL	p.value
	Intercept*	-9.468	-9.742	-9.195	<0.001		Intercept*	-10.879	-11.109	-10.649	<0.001
	Match 2	-0.020	-0.199	0.157	0.825		Match 2	-0.323	-0.513	-0.133	0.001
	Match 3	-0.127	-0.311	0.061	0.187		Match 3	-0.327	-0.527	-0.125	0.002
	Match 4	-0.533	-0.709	-0.355	<0.001		Match 4	-0.578	-0.770	-0.385	<0.001
	Match 5	-0.534	-0.715	-0.353	<0.001		Match 5	-0.585	-0.784	-0.388	<0.001
	Match 6	-0.619	-0.801	-0.433	<0.001		Match 6	-0.486	-0.686	-0.287	<0.001
	after Match	-0.779	-0.933	-0.626	<0.001		after Match	-0.491	-0.677	-0.308	<0.001
	team U18	0.494	0.148	0.840	0.008		team U18	0.059	-0.212	0.330	0.677
	women	-0.087	-0.451	0.276	0.647		women	0.080	-0.214	0.373	0.603
	after Match: team U18	-0.138	-0.358	0.084	0.225		after Match: team U18	0.101	-0.162	0.367	0.455
	after Match: women	0.474	0.228	0.717	<0.001		after Match: women	0.335	0.042	0.628	0.027
	team U18: women	0.027	-0.488	0.544	0.921		team U18: women	0.026	-0.385	0.436	0.905
	after Match: team U18: women	-0.126	-0.464	0.212	0.467		after Match: team U18: women	-0.358	-0.763	0.047	0.086
		Fixed effects – 11OPT						Fixed effects – d5PT
	Fixed effects – 11OPT	estimate	lower.CL	upper.CL	p.value		Fixed effects – d5PT	estimate	lower.CL	upper.CL	p.value
	Intercept*	-11.649	-11.873	-11.425	<0.001		Intercept*	-9.536	-9.819	-9.253	<0.001
	Match 2	-0.106	-0.293	0.082	0.276		Match 2	-0.333	-0.566	-0.102	0.006
	Match 3	0.002	-0.196	0.200	0.982		Match 3	-0.091	-0.333	0.156	0.471
	Match 4	0.012	-0.177	0.202	0.901		Match 4	-0.226	-0.460	0.008	0.062
	Match 5	-0.131	-0.327	0.064	0.195		Match 5	-0.351	-0.592	-0.109	0.005
	Match 6	-0.120	-0.316	0.077	0.240		Match 6	-0.217	-0.458	0.027	0.085
	after Match	-0.639	-0.831	-0.449	<0.001		after Match	-0.427	-0.638	-0.218	<0.001
	team U18	-0.036	-0.299	0.227	0.796		team U18	0.383	0.049	0.716	0.031
	women	-0.085	-0.370	0.201	0.569		women	-0.054	-0.413	0.305	0.771
	after Match: team U18	-0.057	-0.330	0.217	0.683		after Match: team U18	-0.108	-0.409	0.193	0.485
	after Match: women	0.418	0.114	0.721	0.008		after Match: women	0.424	0.088	0.757	0.014
	team U18: women	0.208	-0.190	0.608	0.317		team U18: women	0.036	-0.468	0.541	0.891
	after Match: team U18: women	-0.206	-0.624	0.215	0.339		after Match: team U18: women	-0.272	-0.732	0.190	0.251
		Fixed effects – THE						Fixed effects – THA
	Fixed effects – THE	estimate	lower.CL	upper.CL	p.value		Fixed effects – THA	estimate	lower.CL	upper.CL	p.value
	Intercept*	-7.407	-7.630	-7.183	<0.001		Intercept*	-9.929	-10.197	-9.659	<0.001
	Match 2	-0.193	-0.401	0.013	0.072		Match 2	-0.436	-0.685	-0.190	<0.001
	Match 3	-0.600	-0.816	-0.384	<0.001		Match 3	-0.468	-0.729	-0.206	<0.001
	Match 4	-1.516	-1.725	-1.311	<0.001		Match 4	-0.828	-1.080	-0.578	<0.001
	Match 5	-1.232	-1.447	-1.022	<0.001		Match 5	-0.712	-0.972	-0.455	<0.001
	Match 6	-1.164	-1.378	-0.953	<0.001		Match 6	-0.825	-1.085	-0.567	<0.001
	after Match	-0.385	-0.573	-0.197	<0.001		after Match	-0.379	-0.629	-0.131	0.003
	team U18	0.106	-0.147	0.358	0.424		team U18	0.034	-0.269	0.335	0.832
	women	0.204	-0.074	0.482	0.162		women	0.230	-0.101	0.562	0.185
	after Match: team U18	-0.073	-0.344	0.197	0.600		after Match: team U18	0.028	-0.328	0.385	0.877
	after Match: women	0.331	0.028	0.628	0.033		after Match: women	0.452	0.055	0.847	0.027
	team U18: women	0.099	-0.286	0.484	0.622		team U18: women	0.197	-0.264	0.657	0.414
	after Match: team U18: women	-0.188	-0.600	0.229	0.376		after Match: team U18: women	-0.562	-1.107	-0.013	0.046
		Fixed effects – THB						Fixed effects – aTHB
	Fixed effects – THB	estimate	lower.CL	upper.CL	p.value		Fixed effects – aTHB	estimate	lower.CL	upper.CL	p.value
	Intercept*	-10.194	-10.378	-10.010	<0.001		Intercept*	-9.735	-9.971	-9.500	<0.001
	Match 2	-0.295	-0.457	-0.134	<0.001		Match 2	-0.320	-0.515	-0.127	0.002
	Match 3	-0.345	-0.513	-0.174	<0.001		Match 3	-0.351	-0.553	-0.148	<0.001
	Match 4	-0.721	-0.882	-0.559	<0.001		Match 4	-0.767	-0.961	-0.574	<0.001
	Match 5	-0.771	-0.937	-0.606	<0.001		Match 5	-0.556	-0.756	-0.359	<0.001
	Match 6	-0.670	-0.836	-0.503	<0.001		Match 6	-0.495	-0.694	-0.295	<0.001
	after Match	-0.402	-0.557	-0.250	<0.001		after Match	-0.284	-0.452	-0.119	<0.001
	team U18	0.262	0.048	0.475	0.021		team U18	0.103	-0.177	0.383	0.480
	women	0.295	0.062	0.528	0.017		women	-0.026	-0.327	0.275	0.869
	after Match: team U18	0.081	-0.139	0.302	0.476		after Match: team U18	0.160	-0.078	0.401	0.192
	after Match: women	0.359	0.115	0.603	0.005		after Match: women	0.188	-0.077	0.453	0.168
	team U18: women	-0.093	-0.417	0.231	0.583		team U18: women	-0.057	-0.478	0.366	0.798
	after Match: team U18: women	-0.382	-0.720	-0.045	0.028		after Match: team U18: women	-0.413	-0.779	-0.047	0.029
		Fixed effects – THF						Fixed effects – aTHF
	Fixed effects – THF	estimate	lower.CL	upper.CL	p.value		Fixed effects – aTHF	estimate	lower.CL	upper.CL	p.value
	Intercept*	-8.470	-8.718	-8.222	<0.001		Intercept*	-8.459	-8.714	-8.203	<0.001
	Match 2	-0.175	-0.409	0.064	0.154		Match 2	-0.226	-0.445	-0.011	0.044
	Match 3	-0.551	-0.796	-0.302	<0.001		Match 3	-0.413	-0.639	-0.186	<0.001
	Match 4	-1.683	-1.919	-1.447	<0.001		Match 4	-1.290	-1.508	-1.075	<0.001
	Match 5	-1.424	-1.668	-1.183	<0.001		Match 5	-1.103	-1.328	-0.883	<0.001
	Match 6	-1.504	-1.745	-1.261	<0.001		Match 6	-1.197	-1.421	-0.974	<0.001
	after Match	-0.418	-0.617	-0.220	<0.001		after Match	-0.303	-0.497	-0.113	0.002
	team U18	0.221	-0.055	0.496	0.128		team U18	0.252	-0.049	0.551	0.112
	women	0.195	-0.108	0.499	0.219		women	-0.266	-0.590	0.059	0.120
	after Match: team U18	0.049	-0.236	0.334	0.739		after Match: team U18	-0.031	-0.306	0.247	0.825
	after Match: women	0.468	0.151	0.783	0.004		after Match: women	0.348	0.042	0.654	0.028
	team U18: women	-0.004	-0.425	0.416	0.985		team U18: women	-0.076	-0.530	0.379	0.750
	after Match: team U18: women	-0.448	-0.883	-0.009	0.047		after Match: team U18: women	-0.323	-0.747	0.099	0.138
		Fixed effects – aCL						Fixed effects – bCL
	Fixed effects – aCL	estimate	lower.CL	upper.CL	p.value		Fixed effects – bCL	estimate	lower.CL	upper.CL	p.value
	Intercept*	-8.472	-8.712	-8.231	<0.001		Intercept*	-9.819	-10.044	-9.594	<0.001
	Match 2	-0.097	-0.330	0.135	0.420		Match 2	-0.116	-0.324	0.091	0.278
	Match 3	-0.675	-0.917	-0.431	<0.001		Match 3	-0.374	-0.590	-0.157	<0.001
	Match 4	-1.912	-2.146	-1.681	<0.001		Match 4	-1.231	-1.439	-1.025	<0.001
	Match 5	-1.745	-1.987	-1.509	<0.001		Match 5	-1.183	-1.397	-0.972	<0.001
	Match 6	-1.875	-2.115	-1.638	<0.001		Match 6	-1.260	-1.473	-1.047	<0.001
	after Match	-0.471	-0.669	-0.273	<0.001		after Match	-0.317	-0.498	-0.137	<0.001
	team U18	-0.014	-0.279	0.251	0.922		team U18	0.128	-0.126	0.383	0.336
	women	0.177	-0.116	0.471	0.248		women	0.087	-0.193	0.366	0.553
	after Match: team U18	-0.038	-0.324	0.247	0.797		after Match: team U18	-0.044	-0.304	0.215	0.740
	after Match: women	0.370	0.052	0.685	0.023		after Match: women	0.441	0.152	0.728	0.003
	team U18: women	0.265	-0.141	0.672	0.213		team U18: women	0.166	-0.223	0.555	0.415
	after Match: team U18: women	-0.272	-0.707	0.168	0.227		after Match: team U18: women	-0.354	-0.750	0.046	0.084
		Fixed effects – Ac						Fixed effects – F
	Fixed effects – aC	estimate	lower.CL	upper.CL	p.value		Fixed effects – F	estimate	lower.CL	upper.CL	p.value
	Intercept*	-10.128	-10.304	-9.952	<0.001		Intercept*	-11.800	-12.026	-11.572	<0.001
	Match 2	-0.166	-0.342	0.010	0.069		Match 2	-0.589	-0.805	-0.375	<0.001
	Match 3	-0.495	-0.678	-0.309	<0.001		Match 3	-0.506	-0.734	-0.281	<0.001
	Match 4	-1.217	-1.394	-1.041	<0.001		Match 4	-0.777	-0.996	-0.561	<0.001
	Match 5	-1.282	-1.465	-1.103	<0.001		Match 5	-0.675	-0.900	-0.452	<0.001
	Match 6	-1.313	-1.493	-1.132	<0.001		Match 6	-0.592	-0.817	-0.369	<0.001
	after Match	-0.396	-0.546	-0.248	<0.001		after Match	-0.156	-0.361	0.049	0.140
	team U18	0.191	0.001	0.380	0.057		team U18	0.238	-0.014	0.489	0.073
	women	0.171	-0.040	0.382	0.123		women	0.145	-0.132	0.421	0.316
	after Match: team U18	-0.038	-0.251	0.177	0.731		after Match: team U18	-0.124	-0.418	0.169	0.412
	after Match: women	0.326	0.089	0.563	0.008		after Match: women	0.251	-0.077	0.576	0.134
	team U18: women	-0.013	-0.305	0.278	0.933		team U18: women	0.037	-0.346	0.420	0.854
	after Match: team U18: women	-0.294	-0.622	0.034	0.082		after Match: team U18: women	-0.247	-0.695	0.206	0.286

## Sheet: Supplement Table S2 Full sample
	STAI state	STAI trait	Effective intrinsic	Cognitive intrinsic	Integrated	Identified	Introjected	External	Amotivation	VPh	VC	Creatinine	An	Et	DHEA	11OHAn	11OHEt	16OHDHEA	PD	PT	d5PD	d5AT	THS	11OPT	d5PT	THE	THA	THB	aTHB	THF	aTHF	aCL	bCL	aC	F
STAI state		2.00124e-27	6.96812e-09	2.01882e-08	4.8739e-10	2.40077e-09	0.0208196	0.094472	3.20758e-11	0.00231777	4.30525e-07	0.721189	0.0451027	0.537567	0.214715	0.977017	0.0856361	0.681237	0.254501	0.845437	0.5617	0.356407	0.328476	0.40801	0.107329	0.757586	0.851493	0.496351	0.966074	0.489606	0.757586	0.937505	0.792133	0.674018	0.924364
STAI trait	0.615235		6.59764e-07	4.84376e-05	1.63033e-05	1.04639e-06	0.909129	0.00302281	9.09896e-16	0.000192431	2.37116e-07	0.591946	0.124786	0.628688	0.851493	0.0793169	0.845949	0.417118	0.995764	0.837288	0.915004	0.326389	0.032601	0.321677	0.590408	0.0238531	0.00142455	0.171982	0.0959042	0.0493179	0.0123728	0.00200357	0.00814035	0.00824676	0.00967476
Effective intrinsic	-0.360824	-0.314204		6.78032e-62	1.40213e-34	1.79782e-43	9.99422e-17	0.199539	2.4078e-06	0.252978	0.00197904	0.343639	0.952115	0.0562474	0.598741	0.739014	0.114205	0.228053	0.00186852	0.00603275	0.00551589	0.06046	0.64219	0.627075	0.0218993	0.198612	0.167417	0.199141	0.975533	0.429154	0.270091	0.851493	0.592098	0.840547	0.403681
Cognitive intrinsic	-0.350616	-0.261326	0.751999		6.80172e-33	8.34265e-60	3.08042e-16	0.445865	7.00022e-11	0.0168637	4.74909e-05	0.299671	0.326389	0.567772	0.947305	0.839328	0.480812	0.937505	0.837513	0.447928	0.00949915	0.825256	0.783341	0.574579	0.269559	0.345566	0.586795	0.721189	0.920877	0.445061	0.988888	0.612665	0.589264	0.886915	0.270091
Integrated	-0.384842	-0.275937	0.605429	0.593033		5.45785e-45	1.01008e-11	0.0410946	3.6447e-07	0.06046	0.0016043	0.757586	0.111868	0.475519	0.909129	0.489606	0.851493	0.97297	0.757586	0.840547	0.567772	0.653402	0.855139	0.916104	0.664339	0.886915	0.931227	0.840547	0.42275	0.779285	0.342947	0.773306	0.500998	0.82969	0.980054
Identified	-0.370736	-0.309039	0.663044	0.743463	0.671738		1.47337e-12	0.13567	3.35217e-10	0.00967205	0.0010739	0.97297	0.199408	0.792133	0.705582	0.941808	0.956587	0.757586	0.620292	0.820538	0.0321378	0.868259	0.299671	0.655592	0.475519	0.888179	0.978401	0.399059	0.652705	0.681237	0.517332	0.705582	0.96156	0.721189	0.628688
Introjected	-0.1578	-0.0113498	0.436343	0.430043	0.364947	0.378111		0.000302886	0.0370949	0.0036097	1.60864e-06	0.0695048	0.943792	0.841778	0.786401	0.948886	0.635093	0.931227	0.695954	0.598947	0.0579501	0.840197	0.399059	0.722811	0.37461	0.689778	0.378592	0.68996	0.568724	0.869706	0.948886	0.851493	0.598741	0.892233	0.561378
External	0.119283	0.196761	-0.0819261	-0.0526025	-0.122672	-0.0933367	0.204237		3.87693e-14	0.0969637	0.138516	0.114481	0.0226882	0.0769799	0.0512283	0.506836	0.475137	0.413457	0.249908	0.399376	0.00149316	0.974548	0.0270736	0.811452	0.0127367	0.299671	0.14541	0.549862	0.306215	0.311974	0.29039	0.232661	0.500998	0.191753	0.442107
Amotivation	0.407483	0.481871	-0.260767	-0.351074	-0.27963	-0.339398	-0.124841	0.40157		0.00747563	1.69468e-05	0.989324	0.00121049	0.00328543	0.108307	0.338857	0.851493	0.224965	0.00729505	0.107735	0.345566	0.432807	0.888179	0.82929	0.00783749	0.881567	0.36841	0.125691	0.114205	0.568724	0.891541	0.500293	0.924364	0.575045	0.473892
VPh	0.20112	0.241416	-0.0744695	-0.140842	-0.114007	-0.15103	-0.167891	-0.102619	0.155767		1.78567e-104	1.07002e-05	0.903748	0.104909	0.753754	0.909129	0.80472	0.252978	0.459176	0.455976	0.154247	0.0225982	0.399376	0.00106165	0.0835228	0.342947	0.115905	0.251464	0.851493	0.293579	0.952526	0.688459	0.126012	0.932668	0.193246
VC	0.31838	0.324862	-0.177411	-0.227525	-0.180639	-0.186676	-0.264901	-0.0927376	0.239612	0.749915		0.000566422	0.970527	0.190437	0.924364	0.994487	0.591946	0.179949	0.838253	0.680697	0.121368	0.0851089	0.575045	0.00880886	0.106991	0.267093	0.0275471	0.26676	0.758919	0.190426	0.924364	0.442517	0.176702	0.789236	0.1529
Creatinine	0.0335232	-0.0472502	0.066188	0.0716198	0.0256632	0.00308081	0.11593	0.102509	-0.00100241	0.197412	0.157581		1.26172e-11	4.01884e-06	5.44295e-07	1.96815e-15	1.71513e-07	3.73821e-24	1.65726e-20	3.58478e-05	2.84902e-07	5.1905e-12	8.92203e-35	3.94856e-161	0.251628	4.10182e-09	3.67705e-08	1.74416e-09	6.1498e-07	7.04547e-06	1.31445e-08	2.40349e-08	2.48073e-06	2.48906e-12	5.31219e-12
An	0.146283	0.116036	-0.00527697	-0.0684572	-0.103478	-0.0859336	-0.00631797	0.141385	0.193605	0.00845894	-0.00261639	-0.295901		1.03253e-96	2.21961e-46	2.91443e-60	9.84153e-28	1.0505e-36	9.25119e-34	1.4822e-91	2.48569e-57	2.89054e-51	1.18113e-16	2.35215e-19	1.6622e-76	1.18151e-36	1.74648e-29	2.09878e-43	5.96933e-30	1.91272e-30	1.65436e-35	3.07296e-29	1.08804e-30	4.42234e-32	5.61128e-39
Et	0.0535174	0.0431341	0.121277	-0.0434967	-0.0520933	-0.0223303	-0.0173907	0.113627	0.177422	0.0812013	0.0674577	-0.206648	0.75685		1.48424e-41	6.62072e-52	6.34489e-51	3.28438e-39	7.86175e-91	8.38171e-87	1.84431e-35	7.73158e-43	1.49396e-19	2.60216e-14	4.72225e-58	1.48424e-41	1.10967e-43	3.78489e-57	4.18238e-13	4.3299e-35	7.49743e-09	1.47206e-26	1.06719e-32	4.39172e-24	2.27426e-42
DHEA	0.0968171	0.0184608	0.0399321	0.00595831	0.0102961	0.0301892	0.0230283	0.123452	0.104375	0.0202042	-0.00658629	-0.223328	0.574584	0.548281		2.61004e-13	1.98731e-15	4.19394e-106	3.22416e-30	1.32491e-18	1.24293e-55	2.49245e-19	2.51772e-05	2.43202e-09	2.17867e-71	1.73029e-05	6.45894e-08	1.81032e-23	0.0225982	0.00062917	0.0243864	4.13585e-05	0.000266311	5.68936e-08	3.71829e-13
11OHAn	-0.0027292	0.13062	0.027379	0.0180879	-0.0506373	-0.00657055	-0.00561815	-0.0487856	0.0670202	0.00792898	0.000396186	-0.343048	0.638981	0.602003	0.317835		1.05894e-52	2.2352e-25	8.03175e-36	1.00733e-67	1.58677e-16	1.65431e-59	5.86855e-66	3.31478e-30	6.11608e-30	1.40684e-119	8.94664e-85	9.15597e-80	5.79437e-69	5.24047e-123	3.84998e-95	7.30063e-101	6.06049e-97	1.75549e-108	4.82696e-81
11OHEt	-0.128241	0.0195774	0.102815	-0.0515048	-0.0161394	0.0047323	0.0366235	-0.0522322	-0.0157715	0.0164382	-0.0313158	-0.232427	0.457099	0.597287	0.34298	0.605727		9.6491e-19	1.83217e-37	1.07546e-48	2.7657e-14	1.14486e-24	3.14876e-30	2.49217e-16	8.71207e-19	1.53506e-33	4.96698e-37	6.03824e-49	2.16162e-20	5.29914e-33	1.62766e-19	1.42493e-24	4.4889e-30	7.37823e-30	6.02082e-25
16OHDHEA	-0.0377	-0.0674466	0.0816355	0.00698411	0.00299485	0.0257445	0.00786169	0.0586301	0.0821238	-0.0600156	-0.0688249	-0.428107	0.519401	0.534708	0.779401	0.438386	0.37831		1.16566e-51	5.37018e-25	7.73852e-56	2.77382e-74	5.36392e-19	2.19188e-27	1.29025e-64	4.63128e-13	8.22777e-18	2.92205e-40	6.47198e-08	4.02145e-09	4.2858e-06	4.28462e-10	1.32144e-11	2.02798e-17	3.8081e-19
PD	-0.0900195	0.000351968	0.186725	0.0184229	-0.0255027	0.0380716	-0.0310554	0.0786761	0.163626	0.0413385	0.014049	-0.395588	0.500353	0.741452	0.475671	0.51383	0.524148	0.60083		2.17103e-60	1.663e-29	7.79062e-34	2.70616e-32	9.98679e-31	2.85565e-37	5.22685e-32	2.72931e-43	4.69709e-58	1.25528e-13	2.14912e-23	3.28184e-05	5.08132e-20	2.82848e-25	3.23731e-21	6.78743e-30
PT	-0.0197411	0.0214888	0.167007	0.0548594	-0.017608	0.0200953	0.0398249	0.0601518	0.104579	0.0416122	0.0251572	-0.186632	0.743449	0.730228	0.376919	0.66824	0.58631	0.435226	0.639549		1.47598e-42	6.25881e-63	8.49428e-35	2.86605e-18	8.61228e-63	5.81675e-65	5.20416e-51	1.63314e-71	2.36354e-37	4.48778e-67	1.55143e-43	1.32976e-49	2.26208e-59	3.79578e-56	1.20895e-42
d5PD	0.0510659	0.0113341	0.168609	0.158566	0.0434342	0.13394	0.120532	0.190304	0.0659414	-0.0723772	-0.0777722	-0.22848	0.626503	0.5115	0.618993	0.355211	0.329713	0.619919	0.47037	0.553952		4.112e-50	8.99825e-16	1.26132e-13	1.40001e-135	7.42421e-15	2.33974e-19	6.23932e-42	9.51269e-16	4.41411e-13	3.00836e-15	1.14212e-12	3.37216e-17	1.19702e-19	2.87494e-21
d5AT	-0.0750492	-0.0793572	0.11943	0.0196721	-0.0350248	0.0144101	0.0179229	0.00276566	0.0565876	-0.109067	-0.0854759	-0.301094	0.598948	0.555538	0.384171	0.635808	0.432463	0.691424	0.500865	0.649849	0.593355		3.579e-27	4.19242e-20	1.7564e-61	3.83037e-46	1.73618e-37	5.99162e-57	2.52776e-31	3.12074e-49	3.33738e-39	5.58278e-40	2.21387e-44	1.30236e-50	4.51546e-32
THS	-0.0789545	0.154555	0.0360178	0.0233389	0.0154146	0.071713	-0.060348	-0.13762	-0.012429	-0.0462894	-0.0326391	-0.50705	0.356609	0.386406	0.190022	0.661589	0.475764	0.380872	0.490387	0.507207	0.346909	0.452719		4.6108e-67	3.77991e-13	3.57117e-98	4.59086e-117	5.7173e-101	6.11896e-68	3.28937e-90	3.8419e-55	2.23952e-80	5.64576e-92	1.9376e-103	1.653e-67
11OPT	-0.0685841	0.0800508	-0.0374852	-0.0426488	-0.00959328	0.0347735	-0.0285968	-0.0208134	0.0192948	-0.15109	-0.123367	-0.871714	0.384436	0.330047	0.262964	0.475566	0.35307	0.454398	0.479374	0.373534	0.321749	0.391749	0.665735		6.46103e-05	3.20525e-27	2.2162e-24	1.77888e-24	1.79954e-13	1.96706e-21	1.41301e-20	3.52302e-25	1.33873e-22	2.46154e-31	4.96764e-26
d5PT	0.121265	0.0475157	0.14227	0.0756773	-0.0340553	0.0520273	0.0628687	0.152928	0.162244	0.0858814	0.0807628	-0.0601469	0.698765	0.629621	0.681502	0.473578	0.37877	0.656444	0.52293	0.64928	0.83573	0.643999	0.315798	0.180819		8.25771e-27	1.41905e-32	1.80974e-59	5.56152e-23	1.03587e-24	2.40346e-17	5.80251e-21	2.12602e-26	1.62125e-25	3.68387e-30
THE	-0.0295697	0.162326	0.0861991	0.0659855	-0.0127011	0.0123956	-0.0316825	-0.0717036	0.0132848	0.0511863	0.0585207	-0.259408	0.519065	0.548294	0.193523	0.807468	0.498876	0.314634	0.488372	0.657792	0.336419	0.573341	0.76053	0.453107	0.449878		2.39487e-159	4.13051e-91	4.12407e-62	3.70323e-227	1.29526e-98	5.25569e-208	2.7393e-221	1.27386e-137	2.05634e-80
THA	-0.0187206	0.220722	0.0916761	0.0414617	-0.00776069	-0.00213885	-0.0624099	-0.0957799	0.0635421	0.0787507	0.105725	-0.243941	0.470197	0.560235	0.239783	0.724357	0.521432	0.368849	0.558033	0.597717	0.384477	0.52431	0.802557	0.430025	0.492315	0.869465		1.91715e-142	6.57277e-85	3.53392e-129	8.69327e-60	1.49401e-114	8.65791e-135	2.75839e-105	8.34351e-81
THB	-0.0579034	0.1052	0.0860471	0.0288078	0.0175804	0.0603802	-0.0315729	-0.045156	0.0999604	0.0603382	0.0586111	-0.265216	0.558674	0.625698	0.422263	0.709155	0.587567	0.540879	0.629651	0.681962	0.550432	0.624818	0.767441	0.430838	0.635625	0.742231	0.846413		4.82696e-81	3.07295e-98	1.38009e-49	9.41616e-79	3.03746e-89	6.07374e-111	9.63083e-71
aTHB	0.0044413	0.124858	0.00257823	0.00915258	-0.0576372	-0.0351695	-0.0431803	-0.0709115	0.102807	0.0122859	0.019467	-0.22233	0.473672	0.31523	0.108871	0.672794	0.394486	0.239741	0.321796	0.523452	0.3466	0.48359	0.669056	0.319843	0.418024	0.646562	0.724772	0.713191		9.63083e-71	2.6523e-88	6.34023e-50	2.42059e-60	1.03243e-70	9.13105e-46
THF	-0.0586375	0.143925	0.0569907	0.0552752	-0.023717	0.0324763	-0.0142032	-0.0702131	0.0431882	0.0558757	0.0675162	-0.201711	0.47733	0.509111	0.156819	0.813935	0.495262	0.259567	0.421606	0.665802	0.314916	0.588995	0.739746	0.404227	0.432841	0.931394	0.824981	0.760722	0.679179		3.4832e-124	1.91826e-217	8.14011e-202	8.34407e-195	3.70047e-71
aTHF	-0.0296635	0.177547	-0.0755103	-0.00115443	-0.0664464	-0.0478628	0.00566818	-0.0730483	0.0120556	-0.00394758	0.00656277	-0.251328	0.51182	0.255247	0.107536	0.752853	0.386026	0.206066	0.1875	0.559426	0.340925	0.534647	0.616805	0.396256	0.363987	0.761672	0.636985	0.590746	0.73446	0.816127		6.85287e-115	7.30063e-101	3.00425e-134	2.50419e-48
aCL	0.00814165	0.214354	0.0159081	0.0387219	-0.024226	0.0301875	-0.0157709	-0.0809517	0.0495732	0.0245145	0.0427578	-0.247017	0.468381	0.447893	0.185236	0.767122	0.431657	0.274349	0.390936	0.590844	0.309668	0.539231	0.711071	0.436742	0.399865	0.917596	0.797468	0.705967	0.592426	0.924553	0.79819		4.10035e-197	5.52139e-220	2.69123e-56
bCL	-0.025934	0.186742	0.0406086	0.0411864	-0.0494116	0.00426676	-0.0399748	-0.0493415	0.00874489	0.0768505	0.0692807	-0.210776	0.479091	0.493173	0.166311	0.757457	0.474583	0.295608	0.437537	0.635202	0.362427	0.564018	0.744593	0.414674	0.446617	0.927384	0.83441	0.737085	0.639333	0.912659	0.767149	0.908696		1.62904e-163	8.67343e-58
aC	-0.038555	0.186412	-0.0175942	0.0127163	-0.0191622	0.0288808	-0.0118983	-0.0873701	0.0424494	0.00580459	0.0174844	-0.305281	0.488908	0.4275	0.24074	0.784672	0.472952	0.364777	0.402214	0.621295	0.387354	0.595776	0.773251	0.483689	0.439534	0.839009	0.77753	0.789975	0.67904	0.90666	0.83349	0.926386	0.874646		2.43352e-64
F	0.00980571	0.182839	0.059677	0.0754592	-0.00190303	0.0371811	-0.04419	-0.0556992	0.0524216	0.0670166	0.0726184	-0.300939	0.533294	0.552893	0.315909	0.713196	0.4348	0.382353	0.473233	0.554449	0.402705	0.488827	0.667426	0.443675	0.475218	0.71121	0.712438	0.67917	0.571362	0.680674	0.584468	0.621967	0.628478	0.655362

## Sheet: Supplement Table S2 Man
	STAI state	STAI trait	Effective intrinsic	Cognitive intrinsic	Integrated	Identified	Introjected	External	Amotivation	VPh	VC	Creatinine	An	Et	DHEA	11OHAn	11OHEt	16OHDHEA	PD	PT	d5PD	d5AT	THS	11OPT	d5PT	THE	THA	THB	aTHB	THF	aTHF	aCL	bCL	aC	F
STAI state		4.92795e-14	1.92935e-05	4.57722e-08	2.85883e-07	5.68304e-06	0.0558757	0.138342	1.57436e-09	0.197998	0.00129007	0.918578	0.816612	0.921748	0.275589	0.844168	0.410687	0.813956	0.49291	0.497258	0.656634	0.86845	0.844168	0.623436	0.386269	0.623436	0.988993	0.844168	0.930816	0.512595	0.415395	0.842633	0.675848	0.809823	0.903354
STAI trait	0.673147		0.000348405	0.000765628	0.00111085	0.000666477	0.703477	0.102692	1.00927e-11	0.00479556	8.40282e-06	0.993402	0.561719	0.960674	0.672156	0.134076	0.515984	0.903354	0.486562	0.823661	0.988993	0.844168	0.0926421	0.896935	0.561719	0.0722602	0.0066364	0.3132	0.119141	0.119651	0.161225	0.025289	0.0421452	0.089667	0.275589
Effective intrinsic	-0.350384	-0.321986		5.96939e-32	2.08793e-23	3.37689e-29	3.51032e-15	0.844168	4.66279e-05	0.637617	0.0479532	0.0570484	0.972142	0.0382884	0.593837	0.547145	0.0559243	0.657267	0.0597019	0.00525414	0.0320609	0.410687	0.30878	0.270582	0.157653	0.672156	0.975512	0.76917	0.560945	0.635701	0.830185	0.854918	0.850912	0.756768	0.896935
Cognitive intrinsic	-0.251231	-0.226569	0.800625		1.49716e-24	4.44308e-39	1.58937e-12	0.707599	1.13879e-05	0.585826	0.0575213	0.109246	0.846632	0.502045	0.992338	0.968774	0.727952	0.574944	0.320148	0.038004	0.0158099	0.747361	0.472205	0.493087	0.17746	0.477755	0.9574	0.576347	0.679267	0.199499	0.738848	0.275589	0.673938	0.518328	0.274798
Integrated	-0.33287	-0.263543	0.554265	0.514347		6.49653e-32	2.26881e-12	0.17746	4.49674e-06	0.675848	0.0940913	0.302722	0.560372	0.830185	0.968774	0.844168	0.71181	0.990406	0.926671	0.276596	0.72141	0.992439	0.513298	0.844168	0.731171	0.844168	0.742509	0.603897	0.72141	0.679267	0.992338	0.78958	0.992338	0.76917	0.904293
Identified	-0.368229	-0.328132	0.622262	0.715395	0.594604		3.09697e-10	0.608109	3.82541e-05	0.580045	0.401543	0.978338	0.906494	0.656634	0.905399	0.895266	0.726815	0.824763	0.140318	0.0476951	0.0553879	0.992338	0.844168	0.703477	0.167278	0.942251	0.62979	0.564113	0.649767	0.406701	0.903899	0.463799	0.886563	0.424008	0.351222
Introjected	-0.16026	0.0539725	0.392112	0.39406	0.204796	0.314731		0.0203991	0.0469635	0.2169	0.00512739	0.401543	0.648605	0.0296885	0.187189	0.734662	0.0268658	0.398826	0.097926	0.102778	0.171904	0.895266	0.247166	0.926671	0.253131	0.823661	0.675848	0.76917	0.145773	0.960416	0.809823	0.649988	0.985237	0.968774	0.906494
External	0.0693228	0.232135	-0.14513	-0.15612	-0.130454	-0.146599	0.204524		2.62334e-08	0.312588	0.386269	0.100108	0.00276052	0.00361017	0.00152481	0.978338	0.76917	0.134145	0.127169	0.160113	0.000463419	0.852012	0.0181164	0.511134	0.0103349	0.406819	0.17746	0.823661	0.30878	0.386269	0.254334	0.402558	0.726815	0.340361	0.564113
Amotivation	0.36462	0.450455	-0.251709	-0.384164	-0.231006	-0.401109	0.0166633	0.438366		0.62979	0.0702771	0.520056	0.00674204	0.387217	0.0479532	0.443431	0.437976	0.118317	0.992439	0.455962	0.0108192	0.17529	0.672599	0.499661	0.0025261	0.863548	0.386269	0.254334	0.023217	0.580725	0.580045	0.815936	0.83984	0.721496	0.813956
VPh	0.327563	0.230328	-0.132311	-0.240185	-0.233047	-0.28817	-0.191987	-0.0970652	0.216582		4.53605e-63	8.59371e-05	0.913435	0.726815	0.454506	0.800883	0.496765	0.0046699	0.723685	0.894736	0.638129	0.0086672	0.947803	0.000829552	0.19832	0.76917	0.169695	0.392171	0.0940913	0.567451	0.844168	0.985237	0.497258	0.85755	0.520056
VC	0.391764	0.254636	-0.214163	-0.291201	-0.238019	-0.332887	-0.251573	-0.0738581	0.281915	0.688784		0.00179303	0.976759	0.463799	0.57858	0.75395	0.809823	0.0347604	0.769111	0.484472	0.823661	0.19832	0.713663	0.0138528	0.164529	0.240333	0.0211114	0.125325	0.0631984	0.140641	0.498943	0.353961	0.180777	0.579623	0.490879
Creatinine	0.0999519	-0.0921663	-0.0249637	-0.00950778	-0.102917	-0.00312605	0.0792991	0.042426	0.00478671	0.254036	0.218861		7.55951e-08	4.29153e-05	1.66005e-05	7.16669e-09	1.33774e-05	9.13767e-19	2.71527e-16	4.62859e-05	1.47393e-05	1.87122e-10	7.08432e-22	1.38079e-99	0.12123	7.62413e-08	1.2687e-06	1.6603e-07	0.00036911	1.73965e-05	6.75321e-07	1.95773e-06	3.29161e-06	7.47885e-09	9.10239e-08
An	0.319871	0.167993	-0.0234487	-0.123589	-0.15606	-0.187494	-0.136918	0.0258725	0.181144	0.0408387	-0.0194853	-0.300935		4.62107e-77	1.94181e-35	6.34707e-50	3.7905e-18	2.93592e-37	1.50989e-41	3.16051e-67	1.30017e-44	1.81938e-47	1.72792e-15	2.40643e-14	1.40977e-54	4.76159e-27	5.1131e-22	3.10536e-35	3.06347e-21	7.59491e-23	2.36753e-25	1.99135e-17	3.18598e-25	6.59113e-22	3.91767e-29
Et	0.219845	0.0944147	0.0289841	-0.149432	-0.070978	-0.0993561	-0.154714	-0.000838513	0.182119	0.000142305	-0.0719911	-0.0643374	0.792472		1.34445e-20	6.38516e-27	3.27519e-22	1.08571e-23	4.41687e-59	3.6293e-61	1.30386e-37	5.08867e-39	2.2751e-13	2.9227e-11	1.39675e-40	5.56697e-26	1.62492e-22	4.05342e-31	1.52544e-12	1.09525e-21	2.23232e-12	7.5965e-14	8.68726e-24	2.97794e-14	5.80162e-22
DHEA	0.0886058	-0.0318866	0.140687	0.0299651	0.0290529	0.044681	-0.0515382	-0.0168804	-0.0289543	0.0182639	-0.079017	-0.0829401	0.540243	0.523205		7.70825e-12	1.79221e-10	5.06322e-71	5.58134e-18	8.2267e-14	1.59966e-42	1.39626e-14	9.32262e-08	2.1226e-08	2.91961e-52	0.000167218	5.95936e-05	5.32613e-16	0.000544148	7.26829e-05	6.68608e-05	0.000592052	0.000292943	4.8836e-09	4.64809e-10
11OHAn	0.0492199	0.112309	0.111995	0.0559968	-0.0674237	-0.0468299	0.0192996	-0.0901247	-0.0212022	-0.069111	-0.167332	-0.28114	0.563316	0.558905	0.141006		4.30014e-26	1.32716e-18	6.34288e-18	5.44339e-41	1.19092e-13	1.85445e-45	5.44509e-38	5.22429e-19	1.81302e-19	1.65569e-73	1.5178e-50	2.50718e-47	1.1116e-49	1.89766e-77	4.48392e-100	3.94076e-67	5.71975e-66	6.59517e-74	2.89243e-53
11OHEt	-0.184883	-0.0634077	0.0153632	-0.133488	-0.0791686	-0.0377824	-0.0998735	-0.141325	-0.0115034	-0.0977486	-0.179334	-0.15594	0.435934	0.683697	0.274897	0.654299		5.66208e-12	3.35151e-20	2.98887e-23	1.13634e-09	5.42694e-15	8.52179e-17	9.73343e-13	7.98629e-12	1.75132e-23	1.52901e-23	2.3638e-25	3.18512e-14	2.30104e-20	1.86752e-20	5.90173e-17	1.86752e-20	5.14926e-18	6.38068e-17
16OHDHEA	-0.0979689	-0.165707	0.228655	0.142517	0.0370006	0.13201	0.0460907	0.000736875	-0.112341	-0.0901756	-0.179999	-0.240469	0.437595	0.376906	0.718742	0.273587	0.307813		9.87677e-24	7.97313e-18	1.3439e-43	2.96206e-48	2.22906e-19	2.7391e-22	7.37875e-43	9.60523e-10	7.58472e-12	5.92681e-27	9.60523e-10	3.65853e-09	2.68822e-10	3.29138e-08	2.30429e-09	3.86433e-17	8.3023e-15
PD	-0.0735975	0.0306168	0.255588	0.0291874	0.00270667	-0.0106176	0.00676773	0.0724651	0.124431	-0.0954531	-0.182789	-0.211907	0.458772	0.58497	0.4236	0.420214	0.491325	0.534721		3.01995e-45	2.14488e-37	4.8392e-24	5.94942e-21	4.5481e-24	1.91939e-30	1.02597e-20	2.6491e-24	2.44682e-33	6.78989e-15	7.693e-16	6.64889e-12	9.63755e-12	4.26356e-18	1.09137e-13	6.03014e-20
PT	0.0754317	0.0766566	0.101768	-0.0744341	-0.177431	-0.18214	-0.105092	-0.0138736	0.127622	0.0474945	-0.0588503	-0.0912281	0.676557	0.74232	0.328001	0.668478	0.632203	0.407269	0.698221		2.03301e-29	1.57816e-41	3.04232e-24	1.278e-15	2.17336e-37	6.41085e-42	4.66269e-31	2.73604e-44	9.08448e-25	1.07682e-41	2.59227e-35	1.67234e-27	2.93592e-37	3.10255e-32	8.0965e-29
d5PD	-0.0177038	0.0216851	0.222334	0.117146	0.0860301	0.123523	0.0181646	0.0664008	-0.0644683	-0.0719803	-0.13214	-0.280241	0.536743	0.498481	0.648499	0.370357	0.3567	0.756813	0.569873	0.524293		8.58603e-33	1.61549e-11	1.20906e-10	1.21466e-101	7.35806e-12	6.98806e-14	4.41477e-31	7.09821e-09	1.90291e-10	3.14233e-09	5.62221e-09	4.4652e-12	1.44764e-13	1.83063e-16
d5AT	-0.145026	-0.213946	0.172086	0.032214	-0.0685623	0.0487343	0.0500739	-0.00402882	-0.0428105	-0.102184	-0.160029	-0.186438	0.445757	0.410282	0.307858	0.528409	0.398998	0.680515	0.486945	0.598797	0.608141		7.47205e-24	1.61596e-17	5.45988e-35	4.44838e-37	2.39167e-30	2.31961e-42	1.24076e-24	1.50082e-37	6.41122e-36	1.43677e-29	3.98638e-33	1.59288e-37	3.85496e-26
THS	-0.23629	0.12894	0.178954	0.144685	0.152308	0.201881	0.102039	-0.0231537	-0.168274	-0.197532	-0.232826	-0.437668	0.258252	0.274051	-0.0439066	0.627461	0.469862	0.152217	0.372632	0.446088	0.384055	0.293731		1.6611e-38	3.63886e-11	3.6293e-61	3.14398e-73	1.44177e-70	7.24248e-43	6.06556e-58	3.46405e-46	9.06023e-55	2.93781e-60	4.2011e-69	3.42561e-46
11OPT	-0.0884075	0.129764	0.0257339	-0.00955555	0.0348548	0.0219192	0.00104032	0.0567536	0.0445354	-0.19753	-0.196975	-0.838787	0.360612	0.190324	0.0946265	0.381782	0.245941	0.264412	0.317114	0.25959	0.358762	0.269241	0.632729		5.74537e-05	1.10729e-21	7.22362e-17	3.42059e-18	4.05851e-08	2.87822e-17	4.57283e-18	8.32135e-19	5.18714e-19	1.20414e-22	5.07042e-17
d5PT	0.163845	0.0177643	0.153073	0.0311415	-0.138475	-0.0463186	-0.0103608	0.104306	0.0659188	0.0570127	0.0153159	0.0329567	0.638671	0.59953	0.609442	0.425153	0.347927	0.665557	0.498683	0.640993	0.799015	0.645176	0.206987	0.0679714		1.94528e-15	1.73014e-17	5.35107e-36	2.37923e-14	7.27976e-15	7.80712e-13	5.15184e-11	1.74716e-14	7.88987e-16	5.08391e-20
THE	-0.00810521	0.115505	0.120288	0.0851	-0.0419223	0.0234121	-0.0334259	-0.0389697	-0.0867236	-0.0208974	-0.0815534	-0.0868345	0.472781	0.456133	0.0837549	0.731873	0.423464	0.172807	0.359501	0.635425	0.363584	0.455001	0.716123	0.284308	0.451641		6.84507e-92	1.55133e-56	4.71584e-43	1.5732e-137	3.06404e-90	1.59824e-122	1.36972e-132	5.11028e-87	1.20492e-56
THA	-0.0319995	0.155735	0.185318	0.11812	0.0349128	0.073481	0.037497	-0.0340404	-0.0701782	-0.0435518	-0.0655323	-0.0726367	0.442231	0.488394	0.158037	0.643621	0.458667	0.216129	0.424766	0.602985	0.469246	0.409503	0.757101	0.288995	0.525242	0.86003		4.52571e-85	1.04424e-66	1.09359e-75	3.56088e-59	1.41608e-66	2.78379e-77	1.70849e-65	1.41827e-49
THB	-0.0883889	0.0863811	0.121696	0.00964959	-0.0340311	0.0557649	0.0829174	-0.0193818	0.007784	-0.0619371	-0.141503	-0.112719	0.497576	0.568089	0.329248	0.630997	0.591434	0.408906	0.534167	0.6841	0.610968	0.531083	0.670782	0.27633	0.633754	0.682332	0.811236		2.53163e-60	6.05318e-61	1.88109e-49	9.62954e-48	1.452e-53	9.56631e-66	2.99025e-47
aTHB	-0.0344038	0.0693105	0.113173	0.0806304	-0.081946	-0.0133928	0.0907425	-0.0577106	0.0139375	-0.0936543	-0.105361	-0.279765	0.412305	0.302685	0.0156021	0.678848	0.389146	0.175242	0.343809	0.496526	0.354036	0.402545	0.701466	0.370529	0.418488	0.662761	0.753966	0.731576		5.18845e-45	1.67895e-58	5.64957e-32	7.84316e-37	2.40738e-40	8.04791e-35
THF	-0.0312869	0.123155	0.0460418	-0.0104245	-0.115776	-0.0454198	0.00637761	-0.037143	-0.0209179	-0.00284669	-0.0561838	-0.0521044	0.407149	0.444585	-0.01403	0.757361	0.469804	0.0777525	0.319687	0.640726	0.296528	0.480346	0.68071	0.253789	0.41105	0.909502	0.824342	0.717515	0.69643		6.5131e-110	2.35864e-132	3.93187e-118	1.66369e-116	2.86874e-49
aTHF	0.0555839	0.241763	-0.116551	-0.0525014	-0.152398	-0.121277	-0.0502322	-0.075342	0.0173348	0.0248651	-0.0143149	-0.277819	0.46155	0.228139	0.0276801	0.723634	0.293081	0.160695	0.149956	0.485364	0.309732	0.431341	0.584438	0.374065	0.341685	0.749397	0.62068	0.539318	0.686314	0.784744		1.16501e-91	2.22351e-79	4.56822e-101	3.58213e-46
aCL	0.0581245	0.192812	-0.0063742	-0.0163119	-0.0929252	-0.0323303	-0.0342655	-0.0556101	0.0160148	-0.0388104	-0.0860098	-0.127193	0.489381	0.424304	0.109897	0.676751	0.36249	0.140169	0.290565	0.602411	0.359855	0.458895	0.616891	0.301959	0.436202	0.893116	0.782294	0.655101	0.618148	0.898171	0.81379		1.92667e-120	5.47739e-143	1.07289e-40
bCL	-0.0101253	0.146543	0.0407281	0.0525267	-0.1337	-0.0294372	-0.0388282	-0.0563131	-0.0763575	0.0404333	-0.0398902	-0.0418369	0.383355	0.365424	0.0450099	0.658161	0.402156	0.182855	0.308538	0.609763	0.38983	0.483398	0.675458	0.245465	0.465389	0.905463	0.835313	0.698294	0.666356	0.890502	0.759585	0.874703		6.60013e-100	2.23488e-44
aC	-0.0509922	0.198901	-0.0202813	-0.0507102	-0.0976718	-0.055088	0.0190509	-0.0591702	0.0111204	-0.0386153	-0.111963	-0.215545	0.441612	0.381427	0.0611711	0.705328	0.445752	0.178039	0.313017	0.613164	0.390235	0.49193	0.707409	0.366889	0.407812	0.80625	0.762399	0.772029	0.724463	0.89165	0.832283	0.900766	0.847595		2.00518e-47
F	0.0530521	0.285142	0.091549	0.0542343	0.0180456	-0.032656	-0.0134077	-0.00862374	0.0159507	-0.0111719	-0.0199601	-0.240807	0.499766	0.516215	0.212531	0.642967	0.373703	0.229258	0.34865	0.51571	0.434369	0.369046	0.592997	0.363027	0.436926	0.622794	0.652067	0.580522	0.56496	0.599754	0.530386	0.524103	0.510354	0.551556

## Sheet: Supplement Table S2 Woman
	STAI state	STAI trait	Effective intrinsic	Cognitive intrinsic	Integrated	Identified	Introjected	External	Amotivation	VPh	VC	Creatinine	An	Et	DHEA	11OHAn	11OHEt	16OHDHEA	PD	PT	d5PD	d5AT	THS	11OPT	d5PT	THE	THA	THB	aTHB	THF	aTHF	aCL	bCL	aC	F
STAI state		5.31721e-15	0.000443091	0.017023	0.000934698	0.000198331	0.165056	0.615559	0.000234651	0.0011565	6.39025e-05	0.462542	0.00277254	0.0540217	0.523251	0.747943	0.118552	0.47301	0.610734	0.598988	0.907013	0.245211	0.0355853	0.523251	0.177694	0.955814	0.844922	0.523251	0.835771	0.847279	0.711512	0.700587	0.944579	0.736301	0.727942
STAI trait	0.673147		0.00143591	0.0344492	0.0116615	0.00113353	0.70527	0.0296418	2.48263e-06	0.0310646	0.0154688	0.503996	0.165451	0.492478	0.844922	0.392365	0.673256	0.172491	0.850761	0.593369	0.894425	0.0624304	0.311896	0.309046	0.907013	0.375438	0.203945	0.534427	0.640832	0.339149	0.0310489	0.100122	0.240254	0.0875665	0.00891764
Effective intrinsic	-0.350384	-0.321986		2.90203e-32	2.41432e-12	4.32092e-16	3.24168e-06	0.144615	0.00508062	0.190386	0.019868	0.858832	0.869748	0.837536	0.187342	0.31404	0.907013	0.0183946	0.00741076	0.370782	0.0224661	0.0922558	0.0772264	0.855616	0.145339	0.274697	0.0660134	0.268201	0.309961	0.727942	0.292664	0.957327	0.763534	0.889833	0.435293
Cognitive intrinsic	-0.251231	-0.226569	0.800625		1.57973e-10	5.11676e-23	2.85069e-06	0.109552	5.4569e-06	0.00793811	0.000922824	0.939774	0.259517	0.157377	0.835771	0.671911	0.215576	0.180596	0.837536	0.540257	0.289909	0.818888	0.173153	0.939774	0.827623	0.4749	0.285702	0.939774	0.503996	0.937156	0.69033	0.906207	0.69033	0.700587	0.679821
Integrated	-0.33287	-0.263543	0.554265	0.514347		1.86566e-14	0.0271996	0.19798	0.0111513	0.0103469	0.00861651	0.36468	0.136623	0.564526	0.837536	0.590692	0.511842	0.790058	0.982318	0.080292	0.470822	0.583187	0.147219	0.806039	0.195965	0.75366	0.806039	0.809266	0.495915	0.296508	0.147219	0.425894	0.215157	0.394946	0.8964
Identified	-0.368229	-0.328132	0.622262	0.715395	0.594604		0.000291661	0.140025	1.77293e-06	0.00105884	0.000112301	0.980078	0.062423	0.38485	0.736301	0.72638	0.787188	0.221516	0.937156	0.0711469	0.259517	0.711294	0.0412602	0.88074	0.727942	0.869748	0.546634	0.672649	0.917259	0.732358	0.269835	0.818888	0.837536	0.674692	0.818888
Introjected	-0.16026	0.0539725	0.392112	0.39406	0.204796	0.314731		0.0273634	0.898754	0.0402099	0.00509097	0.509344	0.201314	0.14042	0.696498	0.89427	0.382142	0.727942	0.957017	0.354453	0.8964	0.701588	0.370754	0.99506	0.937156	0.813522	0.788384	0.490278	0.440418	0.957327	0.701546	0.809266	0.778675	0.894425	0.917259
External	0.0693228	0.232135	-0.14513	-0.15612	-0.130454	-0.146599	0.204524		1.16069e-07	0.367595	0.519571	0.74878	0.855616	0.99506	0.902498	0.443047	0.185129	0.99506	0.552895	0.916024	0.597193	0.975332	0.870602	0.667687	0.35887	0.778675	0.809266	0.89427	0.663023	0.790058	0.534427	0.672667	0.670381	0.652248	0.944965
Amotivation	0.36462	0.450455	-0.251709	-0.384164	-0.231006	-0.401109	0.0166633	0.438366		0.0183946	0.00139486	0.969936	0.0728905	0.0711469	0.837536	0.885948	0.933123	0.313497	0.256898	0.242377	0.610569	0.748207	0.101166	0.736301	0.598988	0.466411	0.570243	0.951013	0.916024	0.88703	0.89985	0.906358	0.52825	0.935034	0.906358
VPh	0.327563	0.230328	-0.132311	-0.240185	-0.233047	-0.28817	-0.191987	-0.0970652	0.216582		9.81053e-35	0.000320302	0.687277	0.998333	0.868916	0.443047	0.24305	0.288414	0.256898	0.629249	0.419884	0.216719	0.00731305	0.00731305	0.540257	0.847279	0.667687	0.503996	0.266947	0.976514	0.818888	0.700587	0.69033	0.701533	0.912674
VC	0.391764	0.254636	-0.214163	-0.291201	-0.238019	-0.332887	-0.251573	-0.0738581	0.281915	0.688784		0.00235512	0.856916	0.419884	0.365834	0.0264194	0.0162009	0.0157803	0.0140133	0.526019	0.0923441	0.0347675	0.00120139	0.00745887	0.890979	0.347136	0.473074	0.0680346	0.200373	0.547038	0.895237	0.31404	0.693128	0.169592	0.855616
Creatinine	0.0999519	-0.0921663	-0.0249637	-0.00950778	-0.102917	-0.00312605	0.0792991	0.042426	0.00478671	0.254036	0.218861		1.45365e-05	0.480211	0.333776	5.91771e-05	0.0394182	0.000741402	0.00343741	0.278791	6.27307e-05	0.0115221	4.01898e-11	9.57966e-58	0.747438	0.308278	0.412318	0.164493	6.42913e-05	0.584318	7.32429e-05	0.106236	0.675573	0.00285727	0.000729537
An	0.319871	0.167993	-0.0234487	-0.123589	-0.15606	-0.187494	-0.136918	0.0258725	0.181144	0.0408387	-0.0194853	-0.300935		3.27769e-47	2.60158e-17	4.75135e-19	4.82187e-11	4.02787e-11	3.13167e-12	9.36053e-30	4.58184e-17	1.54141e-11	0.000256224	1.10633e-07	1.09251e-25	5.23833e-13	2.343e-11	1.75661e-14	6.82751e-10	1.15397e-09	2.23318e-12	5.50358e-14	1.32772e-08	2.51016e-11	1.30573e-14
Et	0.219845	0.0944147	0.0289841	-0.149432	-0.070978	-0.0993561	-0.154714	-0.000838513	0.182119	0.000142305	-0.0719911	-0.0643374	0.792472		3.81118e-16	1.04202e-18	1.45338e-30	2.47957e-08	8.53263e-21	1.77055e-38	1.55136e-14	8.4333e-10	9.35811e-05	0.00970059	4.80533e-22	4.33164e-12	6.28277e-14	2.02303e-19	1.28525e-05	1.76781e-11	0.00145501	1.81723e-10	7.19118e-08	1.59312e-08	1.12333e-15
DHEA	0.0886058	-0.0318866	0.140687	0.0299651	0.0290529	0.044681	-0.0515382	-0.0168804	-0.0289543	0.0182639	-0.079017	-0.0829401	0.540243	0.523205		0.067874	8.87235e-05	4.94981e-35	1.95825e-10	1.825e-06	1.1165e-26	8.72583e-06	0.663074	0.258966	6.3879e-23	0.327773	0.0363569	1.66086e-06	0.889785	0.896328	0.795334	0.176329	0.652441	0.506	0.00333894
11OHAn	0.0492199	0.112309	0.111995	0.0559968	-0.0674237	-0.0468299	0.0192996	-0.0901247	-0.0212022	-0.069111	-0.167332	-0.28114	0.563316	0.558905	0.141006		2.73118e-27	9.61746e-05	2.84795e-10	7.79974e-29	4.56395e-08	1.71497e-16	1.35516e-24	1.54602e-08	1.66809e-10	6.86417e-37	3.54872e-26	6.11815e-25	5.18055e-30	7.56037e-41	1.01938e-35	9.04462e-30	1.06268e-27	3.01526e-33	4.09266e-26
11OHEt	-0.184883	-0.0634077	0.0153632	-0.133488	-0.0791686	-0.0377824	-0.0998735	-0.141325	-0.0115034	-0.0977486	-0.179334	-0.15594	0.435934	0.683697	0.274897	0.654299		8.72583e-06	4.20281e-14	4.69457e-25	1.54879e-07	2.72002e-09	7.69173e-13	0.000540279	3.37187e-07	1.97716e-10	3.15196e-12	2.40253e-21	7.46126e-09	7.69555e-13	2.56725e-05	9.3321e-08	1.9548e-09	1.54141e-11	3.35511e-08
16OHDHEA	-0.0979689	-0.165707	0.228655	0.142517	0.0370006	0.13201	0.0460907	0.000736875	-0.112341	-0.0901756	-0.179999	-0.240469	0.437595	0.376906	0.718742	0.273587	0.307813		6.34443e-17	1.14545e-09	8.65904e-41	3.32973e-30	0.045225	0.000174953	1.62669e-28	0.0203616	0.00278002	9.69291e-10	0.0184251	0.370782	0.033062	0.0695555	0.0134995	0.0164968	0.00138153
PD	-0.0735975	0.0306168	0.255588	0.0291874	0.00270667	-0.0106176	0.00676773	0.0724651	0.124431	-0.0954531	-0.182789	-0.211907	0.458772	0.58497	0.4236	0.420214	0.491325	0.534721		2.41371e-32	1.46895e-19	7.65294e-14	3.70292e-08	4.32332e-06	1.5184e-14	1.20816e-07	1.73355e-10	6.88754e-17	4.82814e-07	3.53388e-06	0.0492195	3.06875e-05	8.32564e-06	5.9251e-06	3.1769e-07
PT	0.0754317	0.0766566	0.101768	-0.0744341	-0.177431	-0.18214	-0.105092	-0.0138736	0.127622	0.0474945	-0.0588503	-0.0912281	0.676557	0.74232	0.328001	0.668478	0.632203	0.407269	0.698221		3.26228e-16	5.52488e-22	1.49857e-11	0.000236166	6.4723e-26	2.31201e-25	2.4312e-22	1.32535e-30	2.01493e-14	6.79966e-26	9.48831e-14	2.70884e-22	6.0355e-23	3.01628e-23	1.20448e-15
d5PD	-0.0177038	0.0216851	0.222334	0.117146	0.0860301	0.123523	0.0181646	0.0664008	-0.0644683	-0.0719803	-0.13214	-0.280241	0.536743	0.498481	0.648499	0.370357	0.3567	0.756813	0.569873	0.524293		8.325e-23	1.24425e-08	1.28731e-07	1.55414e-48	8.50854e-08	8.22969e-13	4.77857e-23	1.96558e-07	2.01026e-05	7.62431e-06	1.17505e-07	6.99465e-09	6.74644e-09	5.77452e-11
d5AT	-0.145026	-0.213946	0.172086	0.032214	-0.0685623	0.0487343	0.0500739	-0.00402882	-0.0428105	-0.102184	-0.160029	-0.186438	0.445757	0.410282	0.307858	0.528409	0.398998	0.680515	0.486945	0.598797	0.608141		2.45881e-05	0.000127734	2.47393e-26	4.96992e-12	9.1317e-10	1.13128e-16	1.88573e-09	1.88011e-13	8.21146e-11	3.10422e-12	1.24007e-13	3.88403e-14	5.14854e-08
THS	-0.23629	0.12894	0.178954	0.144685	0.152308	0.201881	0.102039	-0.0231537	-0.168274	-0.197532	-0.232826	-0.437668	0.258252	0.274051	-0.0439066	0.627461	0.469862	0.152217	0.372632	0.446088	0.384055	0.293731		4.21294e-25	0.00441971	1.0642e-34	8.04365e-41	4.30068e-29	9.55062e-33	3.21722e-30	9.36838e-21	1.35888e-23	1.24032e-29	1.6264e-33	1.77489e-21
11OPT	-0.0884075	0.129764	0.0257339	-0.00955555	0.0348548	0.0219192	0.00104032	0.0567536	0.0445354	-0.19753	-0.196975	-0.838787	0.360612	0.190324	0.0946265	0.381782	0.245941	0.264412	0.317114	0.25959	0.358762	0.269241	0.632729		0.450278	4.75795e-05	3.42173e-05	8.07885e-05	4.51242e-08	0.000335673	3.25619e-08	1.35167e-05	0.000553908	6.29131e-08	8.9196e-08
d5PT	0.163845	0.0177643	0.153073	0.0311415	-0.138475	-0.0463186	-0.0103608	0.104306	0.0659188	0.0570127	0.0153159	0.0329567	0.638671	0.59953	0.609442	0.425153	0.347927	0.665557	0.498683	0.640993	0.799015	0.645176	0.206987	0.0679714		7.55016e-12	2.82805e-16	3.36693e-25	3.44163e-10	7.79517e-10	5.78525e-07	4.69941e-11	1.36146e-12	1.08587e-09	4.3368e-11
THE	-0.00810521	0.115505	0.120288	0.0851	-0.0419223	0.0234121	-0.0334259	-0.0389697	-0.0867236	-0.0208974	-0.0815534	-0.0868345	0.472781	0.456133	0.0837549	0.731873	0.423464	0.172807	0.359501	0.635425	0.363584	0.455001	0.716123	0.284308	0.451641		8.17801e-64	2.08854e-30	3.31421e-28	2.76265e-82	1.35664e-39	1.66058e-75	1.28528e-80	4.64322e-50	3.82823e-24
THA	-0.0319995	0.155735	0.185318	0.11812	0.0349128	0.073481	0.037497	-0.0340404	-0.0701782	-0.0435518	-0.0655323	-0.0726367	0.442231	0.488394	0.158037	0.643621	0.458667	0.216129	0.424766	0.602985	0.469246	0.409503	0.757101	0.288995	0.525242	0.86003		3.86303e-51	2.49709e-40	3.74119e-54	6.05027e-24	2.98271e-45	7.32987e-57	1.13316e-41	4.6954e-27
THB	-0.0883889	0.0863811	0.121696	0.00964959	-0.0340311	0.0557649	0.0829174	-0.0193818	0.007784	-0.0619371	-0.141503	-0.112719	0.497576	0.568089	0.329248	0.630997	0.591434	0.408906	0.534167	0.6841	0.610968	0.531083	0.670782	0.27633	0.633754	0.682332	0.811236		7.36784e-37	7.16778e-35	3.00975e-17	2.26844e-27	2.41371e-32	2.33091e-43	1.98123e-20
aTHB	-0.0344038	0.0693105	0.113173	0.0806304	-0.081946	-0.0133928	0.0907425	-0.0577106	0.0139375	-0.0936543	-0.105361	-0.279765	0.412305	0.302685	0.0156021	0.678848	0.389146	0.175242	0.343809	0.496526	0.354036	0.402545	0.701466	0.370529	0.418488	0.662761	0.753966	0.731576		3.92799e-32	7.23569e-31	1.04463e-23	1.3418e-28	7.96705e-36	3.55711e-19
THF	-0.0312869	0.123155	0.0460418	-0.0104245	-0.115776	-0.0454198	0.00637761	-0.037143	-0.0209179	-0.00284669	-0.0561838	-0.0521044	0.407149	0.444585	-0.01403	0.757361	0.469804	0.0777525	0.319687	0.640726	0.296528	0.480346	0.68071	0.253789	0.41105	0.909502	0.824342	0.717515	0.69643		1.05603e-45	1.40341e-77	1.42419e-74	5.62432e-75	4.63975e-22
aTHF	0.0555839	0.241763	-0.116551	-0.0525014	-0.152398	-0.121277	-0.0502322	-0.075342	0.0173348	0.0248651	-0.0143149	-0.277819	0.46155	0.228139	0.0276801	0.723634	0.293081	0.160695	0.149956	0.485364	0.309732	0.431341	0.584438	0.374065	0.341685	0.749397	0.62068	0.539318	0.686314	0.784744		1.08506e-51	3.3042e-41	4.138e-56	1.25581e-16
aCL	0.0581245	0.192812	-0.0063742	-0.0163119	-0.0929252	-0.0323303	-0.0342655	-0.0556101	0.0160148	-0.0388104	-0.0860098	-0.127193	0.489381	0.424304	0.109897	0.676751	0.36249	0.140169	0.290565	0.602411	0.359855	0.458895	0.616891	0.301959	0.436202	0.893116	0.782294	0.655101	0.618148	0.898171	0.81379		1.22007e-68	1.29972e-78	3.33285e-16
bCL	-0.0101253	0.146543	0.0407281	0.0525267	-0.1337	-0.0294372	-0.0388282	-0.0563131	-0.0763575	0.0404333	-0.0398902	-0.0418369	0.383355	0.365424	0.0450099	0.658161	0.402156	0.182855	0.308538	0.609763	0.38983	0.483398	0.675458	0.245465	0.465389	0.905463	0.835313	0.698294	0.666356	0.890502	0.759585	0.874703		3.84368e-60	2.72045e-15
aC	-0.0509922	0.198901	-0.0202813	-0.0507102	-0.0976718	-0.055088	0.0190509	-0.0591702	0.0111204	-0.0386153	-0.111963	-0.215545	0.441612	0.381427	0.0611711	0.705328	0.445752	0.178039	0.313017	0.613164	0.390235	0.49193	0.707409	0.366889	0.407812	0.80625	0.762399	0.772029	0.724463	0.89165	0.832283	0.900766	0.847595		3.78221e-18
F	0.0530521	0.285142	0.091549	0.0542343	0.0180456	-0.032656	-0.0134077	-0.00862374	0.0159507	-0.0111719	-0.0199601	-0.240807	0.499766	0.516215	0.212531	0.642967	0.373703	0.229258	0.34865	0.51571	0.434369	0.369046	0.592997	0.363027	0.436926	0.622794	0.652067	0.580522	0.56496	0.599754	0.530386	0.524103	0.510354	0.551556

## Sheet: Supplement Table S2 U16
	STAI state	STAI trait	Effective intrinsic	Cognitive intrinsic	Integrated	Identified	Introjected	External	Amotivation	VPh	VC	Creatinine	An	Et	DHEA	11OHAn	11OHEt	16OHDHEA	PD	PT	d5PD	d5AT	THS	11OPT	d5PT	THE	THA	THB	aTHB	THF	aTHF	aCL	bCL	aC	F
STAI state		2.31101e-13	1.54688e-05	1.55887e-05	3.85439e-07	1.43817e-06	0.0728156	0.292778	0.000381817	0.655609	0.0192504	0.0459467	0.668782	0.261935	0.616972	0.799363	0.0284829	0.0160408	0.00220971	0.509886	0.478778	0.0454261	0.245343	0.0194994	0.984739	0.482943	0.746888	0.439911	0.673464	0.620232	0.866551	0.943687	0.5568	0.753297	0.410731
STAI trait	0.600087		0.000250973	0.00108456	0.000685512	3.8271e-05	0.450491	0.00774778	3.90055e-07	0.0278667	0.0029324	0.102007	0.554384	0.482943	0.292198	0.532284	0.247651	0.037674	0.0399865	0.570662	0.05773	0.0501094	0.860395	0.130742	0.984739	0.468426	0.220099	0.866551	0.414116	0.547481	0.244902	0.451835	0.396042	0.57454	0.416447
Effective intrinsic	-0.387716	-0.334877		1.75818e-31	9.26269e-17	2.78623e-20	1.45873e-05	0.698552	0.423571	0.427423	0.0869526	0.984739	0.482943	0.00199005	0.808343	0.984739	0.630144	0.613972	0.00806399	0.00157532	0.000696959	0.120384	0.778125	0.798565	0.08251	0.565001	0.798665	0.438518	0.5568	0.885748	0.235617	0.84253	0.482861	0.439911	0.757371
Cognitive intrinsic	-0.387521	-0.303034	0.759211		3.36557e-15	1.03072e-26	6.71979e-07	0.965726	0.0261509	0.0335425	0.00247086	0.96647	0.919529	0.637792	0.802674	0.984739	0.287681	0.710478	0.971748	0.437296	0.0211078	0.984739	0.645983	0.984739	0.781412	0.5967	0.815633	0.919529	0.570662	0.870524	0.9896	0.815633	0.503775	0.80291	0.673917
Integrated	-0.445198	-0.313438	0.596309	0.571336		3.15363e-23	0.000696959	0.88969	0.0522457	0.370798	0.158236	0.668782	0.532065	0.183076	0.631235	0.436896	0.957271	0.558955	0.565001	0.923911	0.30937	0.865878	0.919529	0.757371	0.794863	0.740109	0.962522	0.668782	0.109377	0.815633	0.0796136	0.972248	0.497978	0.599387	0.91231
Identified	-0.425791	-0.371459	0.645596	0.717571	0.68117		2.33015e-05	0.962522	0.00498398	0.0215329	0.0061356	0.926694	0.9896	0.0798053	0.668782	0.478778	0.617243	0.9896	0.716911	0.972248	0.237015	0.952009	0.509886	0.806492	0.898109	0.898533	0.281305	0.880516	0.0108595	0.793673	0.045708	0.931322	0.984739	0.492319	0.779528
Introjected	-0.180765	-0.0904367	0.342502	0.386174	0.27473	0.334993		0.00192742	0.884981	0.0418157	0.0116339	0.228504	0.996681	0.73819	0.815602	0.818821	0.784041	0.914102	0.782798	0.657441	0.482943	0.879462	0.275029	0.9896	0.818821	0.727899	0.260634	0.620232	0.262465	0.967454	0.914102	0.984739	0.747844	0.931322	0.942128
External	0.116171	0.253728	0.0447416	-0.00718759	-0.0186059	-0.00781764	0.254083		8.80901e-13	0.00442547	0.195836	0.119609	0.179094	0.170292	0.239115	0.746888	0.710478	0.902315	0.620232	0.130742	0.211088	0.91231	0.0842404	0.638453	0.0211927	0.371474	0.135972	0.482943	0.171948	0.614347	0.627977	0.440967	0.252581	0.64063	0.570662
Amotivation	0.326037	0.444974	-0.0832653	-0.190201	-0.168557	-0.232832	-0.0194901	0.527563		0.884389	0.180213	0.0227545	0.553345	0.738914	0.885748	0.570662	0.0783738	0.558955	0.921792	0.798565	0.972248	0.214398	0.570662	0.0497081	0.0452086	0.979523	0.75605	0.882936	0.144088	0.497639	0.738721	0.759541	0.971748	0.739088	0.71393
VPh	0.0572182	0.214324	-0.0826957	-0.182673	-0.0905113	-0.195702	-0.176069	-0.235592	0.0196947		1.447e-57	0.00361423	0.107513	0.844169	0.0285834	0.984739	0.893764	0.0274932	0.531692	0.466439	2.7134e-05	0.0468771	0.158236	0.00775176	0.146067	0.798565	0.435915	0.952009	0.64063	0.72325	0.900404	0.962522	0.576241	0.766225	0.662481
VC	0.226453	0.278138	-0.151637	-0.248562	-0.129319	-0.227909	-0.212023	-0.120464	0.123997	0.77696		0.000600536	0.258767	0.416516	0.132098	0.952009	0.784041	0.0887028	0.434138	0.624701	0.000123376	0.279739	0.084982	0.00206228	0.482943	0.617243	0.19235	0.980227	0.509886	0.57345	0.750866	0.907296	0.582026	0.855732	0.657441
Creatinine	0.210538	0.178055	0.00273359	0.0073752	0.0509223	-0.0135013	0.120677	0.148655	0.205467	0.193896	0.224664		5.66061e-05	0.0217918	0.00102924	3.36693e-07	0.000126567	1.56277e-15	5.70641e-11	0.00058982	6.49385e-05	5.24141e-07	6.86627e-24	5.5761e-89	0.637792	4.82515e-05	0.000116799	2.16871e-06	2.31526e-05	0.000348299	4.86815e-06	0.000139313	0.000291415	1.17481e-07	0.000333491
An	0.0585811	0.0790867	0.078575	0.0147502	-0.0718408	-0.00126124	-0.000346025	0.132194	0.0691203	-0.116719	-0.0872345	-0.261281		4.45548e-46	7.69502e-17	3.8955e-36	2.70063e-15	1.68534e-12	1.68175e-18	1.22913e-44	5.72261e-29	1.01037e-24	1.2484e-10	4.40274e-09	8.96681e-42	1.09413e-22	8.44873e-18	1.90783e-20	4.12039e-17	9.37819e-20	2.28296e-22	7.12159e-20	6.17301e-19	5.88629e-21	9.28461e-26
Et	-0.130726	-0.0906145	0.268906	0.0558495	0.131077	0.164553	0.0426599	0.13445	0.0422946	0.0200862	0.0680772	-0.158313	0.751729		5.66773e-14	2.88952e-21	8.4606e-19	5.69618e-14	4.44943e-42	2.86064e-41	1.21269e-17	1.69135e-23	2.46665e-08	3.39185e-05	3.92435e-34	1.43978e-21	2.03553e-22	5.81892e-28	5.15381e-08	9.53367e-20	5.00088e-06	1.20752e-13	7.21721e-16	6.35301e-12	3.29359e-22
DHEA	-0.068361	-0.124056	0.0311715	-0.032181	0.056802	0.051085	-0.0303095	0.118772	0.0204137	-0.151739	-0.110383	-0.217123	0.500488	0.457705		6.77855e-07	1.98107e-09	6.09379e-48	4.06061e-14	2.67516e-06	4.39231e-21	5.69647e-09	7.59029e-05	7.69141e-05	9.2852e-27	0.0279484	0.000122587	1.79055e-13	0.0279956	0.0476582	0.281305	0.00682684	0.0516523	1.77018e-05	1.70165e-08
11OHAn	-0.0375104	0.0823107	-0.00245423	-0.00252887	-0.0863943	-0.0799835	0.0292315	-0.0409239	0.0660116	0.00250817	0.0075721	-0.323953	0.690275	0.55627	0.316159		8.03617e-23	6.50581e-13	1.14486e-17	2.93624e-30	5.06777e-08	3.16596e-30	1.52505e-27	2.96885e-14	8.94538e-18	9.39511e-56	4.21411e-38	1.86786e-37	7.37624e-38	4.82826e-66	1.98884e-64	1.95342e-51	9.55333e-46	2.17486e-57	1.33444e-40
11OHEt	-0.22802	-0.134122	0.0570537	-0.108935	-0.00917015	-0.0592195	-0.0352546	-0.0461167	-0.165374	0.0146073	-0.0267439	-0.249672	0.478253	0.526451	0.374812	0.573941		3.31837e-11	7.7228e-18	4.15619e-18	2.52396e-08	1.49905e-18	8.36408e-12	3.68194e-09	4.3195e-12	6.93527e-14	1.59723e-15	6.64714e-24	5.67708e-13	4.87635e-15	1.5301e-11	7.44913e-11	2.64451e-12	2.39592e-14	1.44905e-11
16OHDHEA	-0.247777	-0.218181	0.0601143	-0.0462273	0.0678352	-0.001449	-0.0157765	0.0177485	0.067949	-0.152963	-0.122142	-0.481862	0.433066	0.457633	0.761616	0.440173	0.409768		2.73798e-26	8.55008e-09	2.55557e-21	4.09053e-32	1.41311e-13	3.43185e-16	7.43225e-24	3.8271e-05	1.79288e-08	9.73807e-22	4.85519e-05	8.42957e-05	0.00588657	6.11031e-05	0.000145909	1.73209e-10	1.78259e-09
PD	-0.30429	-0.215996	0.234882	-0.00635727	0.0670378	0.0451903	0.0356292	0.0585391	0.0143623	-0.0547273	-0.0661238	-0.405355	0.522628	0.729065	0.460075	0.51168	0.514029	0.609449		3.48922e-39	7.50996e-15	3.2973e-22	3.90282e-18	1.19943e-15	2.88952e-21	1.38607e-16	8.51119e-21	5.00416e-29	1.0092e-09	1.98172e-14	5.00487e-05	7.40092e-10	2.86844e-12	1.69157e-11	6.11654e-13
PT	-0.085661	-0.0753795	0.274168	0.0862149	-0.0139883	-0.00601602	0.052862	0.14553	0.0330757	-0.0621842	-0.0439856	-0.226308	0.74372	0.724149	0.300378	0.645032	0.517544	0.361204	0.710978		9.68807e-23	1.4512e-30	4.18278e-14	4.28508e-10	9.90847e-37	8.70586e-30	5.60513e-20	1.94563e-26	1.92637e-15	9.13137e-30	1.17099e-21	7.25492e-22	4.48137e-25	2.26556e-24	2.56923e-19
d5PD	-0.0918328	-0.201445	0.291534	0.208646	0.105176	0.119274	0.0787093	0.124822	-0.00580816	-0.271385	-0.250085	-0.259313	0.633875	0.511313	0.55417	0.34371	0.350641	0.556953	0.471537	0.573033		9.54346e-25	1.76905e-07	9.07743e-09	3.61942e-53	1.11714e-06	6.84214e-08	1.71017e-15	1.73371e-07	2.20294e-05	2.58899e-06	9.00415e-07	3.73972e-08	3.31946e-10	2.03972e-08
d5AT	-0.211161	-0.206978	0.148817	0.00296141	0.0238626	0.00986423	0.021908	-0.016279	0.124049	-0.139529	-0.0840947	-0.319056	0.593904	0.581136	0.365019	0.644714	0.523297	0.660218	0.567048	0.647644	0.594195		7.78255e-11	6.79943e-10	2.13188e-30	6.86961e-17	5.61778e-14	4.44935e-25	2.16302e-12	9.03911e-21	7.99392e-15	4.04927e-16	4.87635e-15	7.34417e-22	8.01187e-14
THS	-0.134728	0.0282037	-0.0365348	-0.0544513	-0.0149284	-0.0745744	-0.111473	-0.162481	-0.0658555	-0.104665	-0.123444	-0.585255	0.398863	0.350906	0.257124	0.621179	0.42078	0.451212	0.517935	0.459836	0.330778	0.402767		7.93772e-38	2.97703e-06	2.20136e-45	3.30518e-51	7.15223e-52	1.86105e-33	2.00303e-38	1.04485e-28	2.86925e-39	4.54861e-47	1.04554e-50	2.99905e-24
11OPT	-0.241463	-0.166866	-0.0330364	-0.00296711	-0.0390688	0.0315045	-0.00158563	-0.055642	-0.181003	-0.180294	-0.205177	-0.896764	0.36747	0.268416	0.256892	0.462253	0.369143	0.491418	0.483597	0.388411	0.360602	0.384408	0.701971		0.00837199	3.32211e-13	5.4625e-11	3.04521e-14	4.99142e-09	1.29555e-11	1.00015e-13	1.38613e-12	7.75522e-13	4.46479e-19	1.70602e-09
d5PT	0.00428433	-0.00323257	0.163302	0.0359145	-0.033851	-0.0186455	0.0292695	0.208444	0.184568	-0.107189	-0.0599519	-0.0424942	0.727211	0.675801	0.613969	0.513119	0.425873	0.58486	0.556284	0.694462	0.786818	0.646226	0.299085	0.178664		1.38613e-12	1.46964e-14	1.1088e-24	1.24984e-11	2.86844e-12	3.11524e-09	3.21885e-11	5.43318e-13	1.81213e-14	1.21615e-15
THE	-0.0907585	0.0935178	0.0669142	0.0621878	0.0418832	-0.0184426	-0.0438159	-0.0960348	-0.00488404	0.0251668	0.0450624	-0.263583	0.572426	0.559787	0.152454	0.798	0.456256	0.266761	0.496917	0.641009	0.310529	0.501197	0.747843	0.445115	0.434549		1.52138e-71	8.02621e-41	7.47643e-33	2.69013e-109	3.71348e-57	2.04558e-96	9.58482e-110	6.01864e-63	2.74898e-37
THA	-0.04704	0.140914	0.0328754	-0.0298761	0.0081369	-0.110087	-0.114257	-0.143802	0.0394352	0.0658594	0.0980998	-0.250962	0.513482	0.569445	0.250227	0.703887	0.481685	0.354066	0.550804	0.541077	0.340624	0.457804	0.777704	0.405746	0.467073	0.854165		1.69255e-69	3.20878e-46	4.326e-59	5.6957e-33	3.71621e-50	4.26966e-64	5.03333e-46	3.60415e-32
THB	-0.0981673	-0.0270407	0.0859358	-0.0148621	0.0510267	-0.0216459	-0.0584934	-0.0786194	0.0212507	-0.00768539	0.00352446	-0.302901	0.546665	0.624971	0.449529	0.699451	0.585443	0.561758	0.63447	0.610887	0.481217	0.597552	0.780912	0.462045	0.593459	0.721385	0.847991		1.26309e-36	2.16837e-44	3.43314e-24	1.16415e-35	1.17753e-39	1.9252e-50	8.3491e-32
aTHB	0.0578749	0.103455	-0.0683393	-0.0656273	-0.152562	-0.22708	-0.113709	-0.133951	0.141467	-0.0418922	-0.0567096	-0.273539	0.50423	0.3435	0.152347	0.702235	0.441227	0.26345	0.380894	0.480428	0.331032	0.431187	0.670724	0.366277	0.417651	0.666059	0.752545	0.693691		7.03254e-35	9.04617e-48	4.31595e-26	1.04292e-30	1.52834e-32	1.26098e-22
THF	-0.0672139	0.080254	0.0203369	0.0229363	-0.0298491	-0.034118	-0.00713154	-0.0599363	0.0766247	0.0337439	0.049537	-0.234529	0.53833	0.538204	0.139056	0.836804	0.474367	0.255575	0.465021	0.640788	0.274229	0.550464	0.706048	0.417335	0.428987	0.930892	0.811747	0.742303	0.68131		3.84308e-69	1.76792e-104	5.80424e-96	1.44318e-87	3.92435e-34
aTHF	0.0269729	0.134951	-0.119647	-0.00125779	-0.164735	-0.184035	-0.0158981	-0.057416	0.0424608	-0.0137457	-0.0305669	-0.293226	0.568864	0.292857	0.0837405	0.83132	0.415967	0.185824	0.262992	0.560828	0.300805	0.471092	0.631569	0.453673	0.370701	0.803897	0.667009	0.588404	0.760683	0.846808		1.05406e-66	5.92855e-57	9.16871e-74	2.19999e-25
aCL	-0.0128616	0.0960705	-0.0267596	0.0300258	-0.00579438	-0.0127584	-0.00352109	-0.0852475	0.0386488	-0.00622864	0.0129858	-0.248255	0.539799	0.452337	0.182875	0.778833	0.403161	0.260193	0.383634	0.563254	0.31298	0.490371	0.711573	0.434537	0.410048	0.910784	0.772551	0.686908	0.607539	0.923993	0.839047		1.35297e-100	4.17266e-103	2.7688e-25
bCL	-0.0785047	0.106384	0.0793786	0.0756631	0.0764535	-0.00387855	-0.0406827	-0.115892	-0.00651138	0.0491035	0.0485319	-0.237317	0.528193	0.486787	0.13687	0.749847	0.429658	0.247542	0.428978	0.597477	0.346758	0.474363	0.757033	0.438871	0.44158	0.931869	0.830102	0.714069	0.648864	0.909887	0.803001	0.917786		1.86728e-78	4.87914e-26
aC	-0.0457752	0.0745757	-0.0855625	-0.0320064	-0.0617687	-0.0773643	-0.0127896	-0.0551699	0.0421304	-0.0287483	-0.0191127	-0.335093	0.55268	0.422917	0.277075	0.804907	0.463722	0.396115	0.415147	0.590313	0.39062	0.563154	0.775295	0.529973	0.465653	0.826026	0.751387	0.773975	0.66363	0.89379	0.860554	0.921787	0.872986		5.07774e-29
F	-0.104091	0.102972	0.0390097	0.0502036	-0.0163642	-0.0362481	0.0115181	0.0660264	0.0456302	0.0396648	0.0401832	-0.235238	0.604281	0.567095	0.354608	0.719982	0.416428	0.375794	0.440655	0.532956	0.352784	0.455232	0.589042	0.376225	0.48347	0.698277	0.660696	0.657741	0.571724	0.675786	0.600625	0.59961	0.606988	0.634368

## Sheet: Supplement Table S2 U18
	STAI state	STAI trait	Effective intrinsic	Cognitive intrinsic	Integrated	Identified	Introjected	External	Amotivation	VPh	VC	Creatinine	An	Et	DHEA	11OHAn	11OHEt	16OHDHEA	PD	PT	d5PD	d5AT	THS	11OPT	d5PT	THE	THA	THB	aTHB	THF	aTHF	aCL	bCL	aC	F
STAI state		8.35764e-16	0.000431853	0.00150608	0.00051379	0.00118744	0.214643	0.315295	3.58612e-08	0.000165395	3.41508e-06	0.274162	0.0159623	0.0128576	0.00848183	0.650056	0.723818	0.180275	0.372901	0.587943	0.0820955	0.793365	0.869969	0.359192	0.0145472	0.684641	0.902095	0.840581	0.912263	0.874779	0.604245	0.72261	0.730834	0.859651	0.207987
STAI trait	0.646218		0.00678396	0.0222962	0.00848183	0.00802534	0.551768	0.252702	7.60917e-10	0.000129194	1.63579e-05	0.00910378	0.0238193	0.022628	0.0425906	0.0392098	0.083911	0.326459	0.0291798	0.0676412	0.0748549	0.619381	0.00586601	0.000365297	0.101871	0.0177929	0.0048338	0.022628	0.211337	0.0320777	0.039343	0.00105746	0.00466561	0.00283952	0.0108555
Effective intrinsic	-0.323404	-0.256592		3.61189e-31	7.85109e-18	1.71321e-23	2.77102e-13	0.0356828	1.45334e-07	0.408035	0.0120423	0.182501	0.393167	0.973221	0.782588	0.620244	0.165644	0.401382	0.111436	0.395049	0.421755	0.300926	0.287095	0.66807	0.267908	0.316891	0.0862254	0.317429	0.525397	0.42735	0.702771	0.604245	0.973221	0.713504	0.423506
Cognitive intrinsic	-0.295416	-0.221125	0.747464		5.02711e-18	4.38796e-33	9.15089e-11	0.398176	1.02948e-10	0.216402	0.0117624	0.153376	0.213888	0.317429	0.500604	0.664791	0.935958	0.398176	0.626495	0.551768	0.083911	0.470843	0.380306	0.374104	0.167724	0.559754	0.283937	0.358351	0.441741	0.378051	0.952381	0.65445	0.935958	0.558233	0.265727
Integrated	-0.31968	-0.250154	0.603304	0.606151		8.9684e-23	9.19307e-10	0.0138899	1.23875e-06	0.11178	0.00576435	0.966048	0.0953499	0.00594189	0.604245	0.816658	0.733928	0.327096	0.162068	0.725609	0.952381	0.347731	0.692507	0.847815	0.74416	0.486912	0.897251	0.992302	0.780737	0.783328	0.803813	0.664791	0.0647068	0.847815	0.914668
Identified	-0.301072	-0.251913	0.674408	0.76246	0.666316		2.50879e-08	0.0327492	1.05804e-08	0.18653	0.100899	0.860885	0.119637	0.0481929	0.66807	0.476074	0.547414	0.347731	0.72261	0.505772	0.0551052	0.591924	0.0123511	0.723818	0.12194	0.723818	0.229162	0.0751834	0.124688	0.335943	0.402292	0.476074	0.843762	0.117241	0.218689
Introjected	-0.130636	0.0679363	0.528834	0.478161	0.455387	0.419499		0.0647068	0.00533796	0.113452	8.24819e-05	0.164072	0.862866	0.694585	0.276021	0.927359	0.275358	0.474154	0.474628	0.604245	0.0541487	0.525397	0.904017	0.564332	0.194533	0.883532	0.907442	0.872586	0.81796	0.987749	0.752225	0.827709	0.816658	0.966048	0.349397
External	0.109238	0.121707	-0.176475	-0.0800649	-0.202631	-0.178966	0.157699		0.000216142	0.520812	0.604245	0.449181	0.0101889	0.0494514	0.0071524	0.822185	0.788057	0.0106372	0.0907293	0.487117	0.0012889	0.361111	0.241409	0.973221	0.0306664	0.74249	0.604744	0.934952	0.932214	0.600095	0.413128	0.480008	0.713504	0.307194	0.0751834
Amotivation	0.47666	0.52301	-0.398651	-0.477018	-0.371322	-0.429301	-0.226733	0.291985		0.0012889	1.29e-05	0.0286645	0.00395671	0.00255675	0.250946	0.72041	0.541173	0.703255	0.00212224	0.225856	0.434257	0.701641	0.701641	0.0266209	0.248333	0.780737	0.441741	0.18653	0.42735	0.955426	0.847815	0.564332	0.900759	0.791853	0.531677
VPh	0.343412	0.34826	-0.0783064	-0.111662	-0.138372	-0.118271	-0.13777	0.0626788	0.257949		7.41776e-46	0.00230872	0.935958	0.588539	0.626495	0.592183	0.74249	0.219441	0.551768	0.755071	0.780737	0.00590298	0.964066	0.0600052	0.0832753	0.469709	0.233574	0.441741	0.643628	0.713504	0.740314	0.605911	0.30001	0.973221	0.390579
VC	0.411973	0.386129	-0.2064	-0.207053	-0.224921	-0.142124	-0.30871	-0.0511742	0.338116	0.713295		0.209229	0.860885	0.737653	0.847815	0.725609	0.422719	0.317429	0.531677	0.664791	0.713504	0.0449575	0.564332	0.531905	0.0435337	0.422442	0.117241	0.327096	0.371943	0.402292	0.755071	0.402483	0.332021	0.705365	0.145291
Creatinine	-0.121789	-0.257302	0.123252	0.130581	-0.00435187	0.0183299	0.127806	0.0745527	-0.189105	0.197287	0.0907172		7.75176e-10	1.43157e-06	1.70965e-05	2.15397e-10	0.000100922	6.9275e-14	4.29453e-12	0.0015459	0.000308946	8.20359e-08	1.05694e-13	9.98949e-74	0.0697492	2.44272e-05	0.000111289	3.32756e-05	0.0051649	0.0046039	0.000431853	0.000102783	0.00280781	2.91238e-06	8.36723e-10
An	0.239907	0.226968	-0.0837692	-0.116136	-0.148969	-0.140239	0.0179896	0.217794	0.241488	0.00641355	0.0142434	-0.372871		4.72509e-47	1.89084e-24	4.72899e-27	4.68538e-12	8.63002e-23	1.34112e-15	1.3505e-43	2.06833e-29	1.36061e-25	2.05011e-08	8.98989e-13	5.50738e-34	3.68898e-18	2.00498e-15	4.2615e-22	3.27043e-15	1.40814e-12	4.60969e-16	6.06794e-14	6.57609e-14	8.33292e-14	4.13521e-17
Et	0.246665	0.228782	0.00306532	-0.0961946	-0.23145	-0.172745	-0.0414987	0.171869	0.25137	0.0430288	0.0268179	-0.29898	0.742572		2.62856e-20	1.85272e-30	3.65202e-30	5.66626e-21	2.69681e-47	9.49102e-40	6.75784e-17	1.51855e-16	2.86723e-13	4.80349e-12	1.02713e-22	5.60786e-24	1.68326e-26	1.47364e-27	1.03369e-06	8.35764e-16	0.000597673	1.81476e-15	5.50479e-18	2.07646e-12	1.02105e-22
DHEA	0.259431	0.206434	0.028664	0.0673032	-0.0531525	0.0445288	0.103556	0.226897	0.10836	0.0386647	0.0158396	-0.269442	0.576622	0.531457		1.76693e-06	2.04817e-05	1.46268e-52	1.43798e-13	2.03933e-09	2.33054e-32	2.96766e-08	0.0381278	4.7736e-06	9.50291e-38	0.000294042	0.000290493	5.05029e-09	0.474628	0.0423852	0.0753516	0.00194954	0.00848183	0.00212248	1.43356e-05
11OHAn	0.0551855	0.20959	0.0506651	0.0451219	-0.0244061	0.070693	-0.00989444	-0.0235411	0.0376191	-0.0425388	-0.0280955	-0.383774	0.601759	0.631981	0.296599		2.25583e-29	2.6079e-12	1.17778e-17	3.4048e-37	1.15455e-08	2.24878e-27	4.96404e-41	9.01011e-18	6.53505e-13	2.07064e-65	1.74605e-49	4.73896e-41	4.01389e-32	2.42564e-56	3.26047e-36	1.39206e-50	5.80636e-50	3.09869e-50	1.91117e-41
11OHEt	-0.0429029	0.179519	0.127339	0.00850852	-0.0350757	0.0610623	0.10377	-0.0278514	0.0618588	-0.0261329	-0.0610634	-0.246092	0.413909	0.629479	0.267146	0.622634		6.06644e-07	4.53103e-18	1.08255e-28	1.40295e-05	4.96821e-07	2.09964e-20	6.6905e-09	3.812e-06	4.7753e-21	3.45763e-23	1.15083e-23	4.55071e-09	4.42922e-17	8.9262e-09	1.3652e-14	6.19389e-18	1.44947e-15	1.3652e-14
16OHDHEA	0.144861	0.110849	0.0822661	0.0828119	-0.0943924	0.09114	0.0712704	0.216642	0.0401108	-0.089046	-0.0746583	-0.444337	0.559264	0.539184	0.770246	0.418364	0.308434		1.64583e-23	3.97031e-14	4.7728e-35	7.81295e-39	4.89577e-08	1.8781e-14	6.76311e-37	3.60744e-10	9.61761e-12	2.93906e-18	0.000562543	0.000169974	0.000431853	4.18251e-07	3.01786e-08	4.33585e-08	1.16396e-10
PD	0.101812	0.2201	0.143249	0.0497694	-0.128379	0.0371336	-0.0709792	0.150761	0.255594	0.0468405	0.0489859	-0.414588	0.470287	0.743893	0.439228	0.498586	0.504114	0.566902		9.30613e-24	4.16176e-14	3.52556e-12	2.51886e-15	1.70859e-17	6.93115e-16	8.17551e-17	4.20304e-24	6.62007e-28	2.92629e-05	7.60917e-10	0.128004	1.36161e-11	5.19108e-14	2.26512e-10	1.77632e-17
PT	0.0651726	0.188716	0.0834143	0.060251	-0.0361651	0.0666033	0.0529881	0.0689519	0.113357	0.0248137	0.0349998	-0.204255	0.72333	0.699846	0.364305	0.68286	0.61677	0.448295	0.569544		8.77929e-21	2.32516e-30	9.88882e-26	9.96062e-12	1.12695e-24	4.33864e-43	6.00954e-40	6.36277e-46	2.33115e-25	2.46406e-38	1.31134e-24	3.44489e-34	1.65115e-38	1.44421e-34	1.38656e-27
d5PD	0.180691	0.184672	0.0790334	0.153644	0.00641915	0.168347	0.16898	0.266367	0.076812	0.0226047	0.0301191	-0.229851	0.622992	0.488448	0.647336	0.348373	0.272019	0.667701	0.447947	0.536994		3.04811e-27	3.04174e-09	2.10925e-06	6.4715e-83	3.49156e-09	2.6079e-12	3.67587e-25	6.25565e-09	4.67791e-08	1.10632e-09	4.07724e-07	1.10128e-09	4.33697e-10	8.59959e-14
d5AT	0.0316894	0.0595898	0.0992386	0.0717718	-0.0910444	0.0549841	0.0641096	0.0887712	-0.040638	-0.180669	-0.1361	-0.329192	0.587989	0.483647	0.33931	0.604796	0.310599	0.693928	0.416077	0.631133	0.603529		4.87993e-19	1.7683e-12	5.68144e-30	1.37618e-33	3.42598e-28	1.55779e-30	7.18697e-22	5.89978e-28	9.36794e-28	6.33305e-28	8.48659e-33	9.98622e-30	6.30199e-20
THS	-0.0200914	0.270281	0.101584	0.0856597	0.0418368	0.21256	-0.012786	-0.110231	0.0405368	-0.00377756	0.0452194	-0.441387	0.342936	0.434422	0.139826	0.707955	0.532621	0.334293	0.466203	0.589385	0.360749	0.516284		8.9816e-31	2.17329e-08	4.78089e-53	1.79242e-67	4.04018e-52	3.06003e-35	9.84231e-54	2.51514e-27	2.73348e-41	7.09889e-45	1.04052e-53	1.97733e-47
11OPT	0.104349	0.338867	-0.0446441	-0.0867003	0.0200397	0.0366108	-0.0584062	0.00299222	0.191269	-0.128779	-0.0488721	-0.848222	0.426344	0.413689	0.285002	0.50012	0.353488	0.453237	0.496457	0.408168	0.294572	0.421355	0.634623		0.00184197	1.64924e-15	2.89102e-15	1.62432e-12	4.67811e-06	3.01168e-11	1.37121e-08	1.42263e-13	3.27679e-11	4.5455e-14	7.23873e-19
d5PT	0.242803	0.171265	0.105195	0.126756	-0.0333909	0.139457	0.120404	0.18702	0.108916	0.119742	0.136926	-0.124265	0.659862	0.558359	0.686654	0.428636	0.2877	0.680801	0.474429	0.578958	0.872444	0.62785	0.342346	0.201305		3.86688e-16	4.44394e-20	2.07803e-32	1.12728e-12	1.83936e-12	1.7535e-09	2.78535e-12	5.23357e-14	1.8942e-12	1.53636e-16
THE	0.0500674	0.236494	0.0965339	0.0591238	-0.0690939	0.0366974	-0.0153849	-0.0337152	0.0290836	0.0558872	0.0611795	-0.264886	0.505281	0.571814	0.230624	0.82178	0.540057	0.379447	0.487306	0.720379	0.359486	0.656872	0.772519	0.46894	0.478022		4.9027e-87	6.20026e-52	7.1591e-30	5.24234e-118	5.2115e-43	9.38478e-109	3.64384e-110	2.87508e-73	7.88609e-44
THA	0.0153761	0.275814	0.152578	0.102188	-0.0139017	0.112643	-0.0122992	-0.0526451	0.0755601	0.0867681	0.10963	-0.244656	0.467658	0.596651	0.230852	0.755052	0.563461	0.408468	0.573114	0.701137	0.418355	0.612372	0.82875	0.465307	0.528768	0.881908		4.32092e-77	1.98664e-39	2.61113e-72	1.6627e-27	1.10353e-63	7.3963e-70	4.14026e-60	9.72157e-52
THB	-0.0251509	0.228698	0.0961242	0.0893691	-0.000766358	0.157688	0.0167481	0.00884007	0.122184	0.0587111	0.0733318	-0.260858	0.55171	0.606522	0.356107	0.708126	0.568531	0.506562	0.609733	0.736492	0.583757	0.632637	0.768086	0.422004	0.647762	0.767161	0.857607		4.31156e-46	3.45358e-52	1.28307e-25	6.68069e-45	1.16984e-49	1.61578e-60	4.49e-40
aTHB	-0.0136774	0.136572	0.064066	0.0757713	0.028984	0.138554	0.0240943	-0.00926441	0.0778786	0.0371563	0.0676913	-0.182684	0.464499	0.302642	0.0548781	0.645464	0.357082	0.2206	0.262548	0.585707	0.354136	0.549208	0.669121	0.285282	0.424696	0.626975	0.697775	0.737451		5.08901e-36	2.67052e-40	1.59014e-24	1.09632e-29	2.15776e-38	1.02294e-23
THF	-0.0191945	0.216772	0.0777698	0.0860681	-0.0284523	0.0929119	-0.00138493	-0.0538833	0.00588139	0.0298242	0.0636422	-0.184943	0.423067	0.473217	0.137174	0.787036	0.490922	0.238622	0.373085	0.690557	0.334774	0.610253	0.775737	0.399634	0.421034	0.933848	0.843928	0.768468	0.674688		1.28931e-56	4.45943e-114	7.73348e-104	2.38092e-103	1.28013e-37
aTHF	-0.0618631	0.209374	-0.0402921	0.00634062	0.0258954	0.0819223	0.0324619	-0.0802175	-0.0200868	-0.0265097	0.0247502	-0.22476	0.476929	0.219623	0.122019	0.676073	0.350819	0.224733	0.106446	0.578271	0.369681	0.608355	0.604321	0.346739	0.365661	0.71987	0.606014	0.58827	0.703424	0.788256		3.59812e-50	2.10372e-44	3.06079e-60	2.11352e-23
aCL	0.0435436	0.314782	0.0529789	0.0465464	-0.0452122	0.070576	-0.0228615	-0.0700041	0.0582653	0.04065	0.0634722	-0.245793	0.445295	0.468312	0.200302	0.760674	0.45534	0.312458	0.405766	0.661402	0.312768	0.609942	0.709621	0.439337	0.417839	0.920888	0.815691	0.73084	0.577405	0.928631	0.758569		5.43361e-97	2.15325e-113	4.14476e-32
bCL	0.0415996	0.276838	0.0032817	0.00827181	-0.163007	0.0210174	-0.0243638	0.0384324	0.0134086	0.0772362	0.0726408	-0.193828	0.444721	0.502966	0.172808	0.757503	0.502276	0.33911	0.446408	0.69178	0.369758	0.650829	0.730642	0.398942	0.446317	0.92301	0.836425	0.755962	0.625351	0.91341	0.727977	0.90171		2.17855e-82	1.42275e-32
aC	-0.0219585	0.289907	0.0384759	0.0594095	0.0200774	0.141061	-0.00443149	-0.0981868	0.0273412	-0.00268552	0.0308491	-0.290876	0.443062	0.420084	0.198764	0.758943	0.469772	0.335549	0.383324	0.664196	0.377875	0.625729	0.775554	0.447326	0.420785	0.846811	0.802272	0.803991	0.690978	0.912534	0.802852	0.92752	0.87109		8.73652e-36
F	0.137577	0.251983	0.0784721	0.105661	0.011287	0.114908	-0.090703	-0.157753	0.0632441	0.0653617	0.103117	-0.372183	0.491353	0.558421	0.271708	0.710607	0.455342	0.388806	0.496201	0.606796	0.442814	0.526954	0.744647	0.514155	0.483541	0.724706	0.76619	0.701974	0.569089	0.68575	0.565712	0.645315	0.64907	0.673006

## Sheet: Supplement Table S2 U16 man
	STAI state	STAI trait	Effective intrinsic	Cognitive intrinsic	Integrated	Identified	Introjected	External	Amotivation	VPh	VC	Creatinine	An	Et	DHEA	11OHAn	11OHEt	16OHDHEA	PD	PT	d5PD	d5AT	THS	11OPT	d5PT	THE	THA	THB	aTHB	THF	aTHF	aCL	bCL	aC	F
STAI state		1.70843e-06	0.00985157	0.000190416	6.05944e-05	0.000317395	0.0336935	0.557709	0.000306723	0.641362	0.342543	0.8145	0.331508	0.642277	0.357139	0.430157	0.929414	0.797921	0.209545	0.600168	0.884406	0.468518	0.931505	0.307143	0.212493	0.736568	0.931505	0.495036	0.275244	0.904576	0.557791	0.935251	0.626451	0.698627	0.832618
STAI trait	0.534829		0.0130018	0.0109023	0.0888755	0.00572101	0.0407965	0.363351	3.5355e-06	0.208631	0.0371678	0.211013	0.332268	0.422618	0.865826	0.217654	0.99785	0.511205	0.00491318	0.707368	0.338359	0.868404	0.924157	0.0470715	0.620097	0.853261	0.481486	0.931519	0.289064	0.665033	0.338359	0.750094	0.777118	0.719266	0.762722
Effective intrinsic	-0.319871	-0.309431		9.51325e-21	3.03777e-13	3.52981e-17	8.63409e-08	0.00367472	0.582952	0.313401	0.116206	0.0741569	0.743382	0.00136199	0.0781756	0.35533	0.992066	0.0336352	0.260718	0.0160455	0.0452604	0.8145	0.0973897	0.307143	0.526793	0.680524	0.711053	0.659366	0.133947	0.831657	0.155814	0.78513	0.6154	0.125555	0.945613
Cognitive intrinsic	-0.43777	-0.316079	0.784123		1.50852e-09	2.74263e-21	8.59949e-09	0.0380656	0.34399	0.146847	0.0303098	0.0564622	0.999791	0.0819302	0.235692	0.797921	0.628511	0.145882	0.861287	0.145882	0.0723642	0.465244	0.0640634	0.33095	0.637312	0.777377	0.302821	0.421402	0.0445514	0.63372	0.604863	0.831657	0.666128	0.589199	0.637156
Integrated	-0.464787	-0.223765	0.66704	0.578784		1.56584e-15	1.9425e-08	0.19454	0.215675	0.884406	0.448114	0.182609	0.748106	0.0759524	0.333308	0.797921	0.877736	0.377469	0.831657	0.800158	0.868404	0.931519	0.543211	0.792218	0.80066	0.455842	0.891025	0.917593	0.203761	0.724263	0.312213	0.797921	0.195631	0.742643	0.704444
Identified	-0.42459	-0.338738	0.736149	0.79071	0.709725		1.85696e-08	0.0859746	0.102867	0.0659596	0.045459	0.262113	0.854016	0.0132585	0.543214	0.736568	0.508097	0.311774	0.55276	0.397724	0.337919	0.956481	0.033259	0.620942	0.720008	0.783951	0.0414366	0.316973	0.00644532	0.997187	0.095637	0.728685	0.983475	0.313401	0.971424
Introjected	-0.271127	-0.262615	0.524191	0.556214	0.54538	0.546105		0.00129893	0.283476	0.00530429	0.0115174	0.308953	0.76002	0.0961501	0.90081	0.797921	0.870855	0.903743	0.156477	0.345016	0.33773	0.797921	0.181751	0.931519	0.777118	0.992074	0.343969	0.402763	0.0376537	0.96005	0.449289	0.797921	0.992066	0.777544	0.861465
External	0.0907647	0.130836	0.310523	0.232493	0.155929	0.197349	0.339582		3.51262e-08	0.00198121	0.0175764	0.0885075	0.0122707	0.161172	0.00204391	0.863472	0.875029	0.106004	0.497689	0.018212	9.99124e-05	0.445254	0.0839247	0.466403	0.000340463	0.422618	0.137924	0.917593	0.218242	0.5595	0.50783	0.573653	0.417842	0.721533	0.727127
Amotivation	0.425537	0.523991	-0.0749238	-0.118225	-0.149647	-0.188344	-0.133171	0.537102		0.292417	0.393528	0.142103	0.0510924	0.828748	0.0780214	0.327478	0.279612	0.146847	0.145882	0.737175	0.0211886	0.0865727	0.999791	0.0911567	0.00317458	0.97118	0.720008	0.488591	0.0145719	0.597036	0.361587	0.854588	0.999791	0.68092	0.620942
VPh	-0.0738592	0.172871	-0.12568	-0.170704	-0.0205189	-0.2098	-0.299585	-0.328036	-0.130853		6.64035e-35	0.044138	0.0203719	0.521545	7.90772e-06	0.870855	0.521545	5.14167e-06	0.00472605	0.093151	2.65427e-06	0.00240316	0.375164	0.0806753	0.00312185	0.712141	0.581301	0.45602	0.604863	0.800158	0.800158	0.78787	0.774964	0.459212	0.915533
VC	0.135239	0.265168	-0.182631	-0.241468	-0.0986904	-0.225138	-0.275295	-0.260843	-0.108619	0.778674		0.0100822	0.252273	0.728775	0.000646672	0.685086	0.819653	0.000922282	0.00429522	0.508097	0.00013171	0.224831	0.260718	0.0264226	0.0571851	0.283476	0.285857	0.728481	0.720008	0.459212	0.681404	0.838348	0.510376	0.797921	0.86707
Creatinine	0.0410758	0.184716	0.214787	0.227072	0.167238	0.144948	0.133483	0.205595	0.181426	0.179622	0.222287		0.000264278	0.00328793	0.00172577	7.40947e-05	0.00139516	3.07269e-13	8.58321e-08	0.00116297	0.00487379	1.88666e-06	2.09738e-15	3.15918e-48	0.449289	0.00075887	0.00151819	2.2308e-05	0.000960633	0.000905328	5.1403e-05	0.000906078	0.00136963	7.67113e-06	0.00147605
An	0.149041	0.148698	0.0495538	0.000290778	-0.0487542	0.0283074	0.0468373	0.286468	0.231293	-0.204247	-0.111794	-0.304872		3.5921e-29	6.26926e-13	3.21053e-29	4.36614e-10	1.34002e-13	5.29206e-16	2.88774e-31	2.15035e-18	4.72604e-28	6.02832e-08	1.45314e-07	1.1436e-30	2.13125e-15	2.08022e-11	3.87752e-15	2.44178e-11	8.50756e-13	1.90586e-15	5.13364e-12	5.36721e-13	4.11151e-13	1.68724e-14
Et	-0.0790951	-0.126317	0.354351	0.209668	0.213622	0.283664	0.201081	0.174003	-0.0329626	-0.0675335	0.0395928	-0.251439	0.760743		0.00263597	4.11151e-13	7.73894e-11	3.08198e-05	2.13657e-25	1.14605e-33	2.81e-14	1.03011e-21	9.42679e-06	6.76983e-06	1.81736e-19	1.55008e-15	4.14792e-12	2.03385e-14	5.74804e-08	2.59908e-12	8.12086e-07	8.56954e-09	1.61949e-12	3.68341e-07	1.94976e-09
DHEA	0.141379	0.0300784	-0.211985	-0.151624	-0.127245	-0.0855378	0.0189712	0.342727	0.212197	-0.364859	-0.287356	-0.266202	0.550378	0.256614		1.06578e-06	4.59031e-06	6.23234e-34	9.99124e-05	0.000647378	8.50756e-13	1.9623e-06	4.06985e-05	2.98676e-05	8.66909e-15	0.0925822	0.0826954	6.22175e-07	0.0157357	0.0780214	0.00693049	0.00767517	0.066233	4.2439e-06	0.000146532
11OHAn	0.124609	0.182248	-0.121779	-0.0391695	-0.0390394	-0.0509978	0.0391495	0.0262798	0.128962	-0.0182182	0.0459953	-0.328056	0.761239	0.554029	0.394974		6.38733e-14	2.57846e-09	1.87561e-08	7.47325e-17	2.85084e-07	2.57151e-26	4.74917e-15	4.23528e-09	7.89354e-13	2.49131e-33	1.23269e-22	7.11873e-22	4.6445e-23	3.30519e-37	2.31305e-52	5.54903e-35	1.1494e-29	9.48931e-34	4.72408e-26
11OHEt	-0.0160577	0.00112951	0.00241747	-0.0705393	-0.0228052	-0.0918815	-0.0242705	0.0233617	-0.140853	0.067456	0.0259478	-0.270923	0.489095	0.506572	0.373288	0.569229		2.98964e-05	1.70062e-09	6.50866e-08	0.000264079	5.27803e-08	2.51332e-07	9.8343e-07	2.03795e-06	6.35685e-10	1.07738e-10	2.26058e-14	3.1568e-10	6.04814e-09	2.20424e-09	2.96738e-07	2.94329e-08	4.8053e-08	1.808e-08
16OHDHEA	0.0456398	-0.106195	-0.249161	-0.179718	-0.117041	-0.132774	0.0183805	0.196188	0.179121	-0.371564	-0.279896	-0.556671	0.563397	0.343017	0.79807	0.470245	0.343572		2.94408e-07	0.000198515	5.41971e-17	5.01185e-19	4.79636e-13	6.32271e-15	2.35765e-14	0.000265327	3.93214e-05	6.93919e-13	1.53346e-05	0.000452602	1.66506e-05	4.5395e-06	6.99094e-05	2.34566e-11	1.3533e-06
PD	-0.185323	-0.365877	0.145424	0.0269654	0.031996	0.0839989	0.175646	0.0939016	-0.179836	-0.24286	-0.245165	-0.428318	0.605238	0.725444	0.322799	0.447149	0.474894	0.412468		1.03719e-26	4.93617e-12	1.14077e-10	2.73279e-10	1.41222e-12	3.81432e-11	5.44126e-10	1.37066e-10	4.47881e-14	1.99391e-08	3.35033e-08	4.26446e-06	3.5355e-06	2.81925e-08	3.19833e-06	1.76867e-06
PT	0.0884324	-0.0669548	0.276847	0.179897	0.0376393	0.113221	0.123835	0.27223	0.0507327	-0.153913	-0.0694664	-0.275004	0.778135	0.796036	0.287264	0.618525	0.431736	0.310254	0.7384		1.20988e-15	1.33414e-18	2.62696e-09	7.13e-09	4.38162e-21	9.37715e-21	1.49182e-12	2.19202e-16	2.99896e-09	1.00888e-17	4.47815e-15	3.55647e-13	1.18926e-16	8.50756e-13	2.07947e-12
d5PD	0.0251228	-0.146481	0.236536	0.215971	0.0248323	0.126071	0.126258	0.418639	0.266655	-0.381673	-0.317872	-0.242061	0.641052	0.575616	0.547523	0.412941	0.304954	0.620671	0.532077	0.599481		8.63039e-21	1.76867e-06	6.57841e-07	8.16116e-43	2.43992e-06	7.43864e-06	6.52379e-13	0.000196388	1.55957e-05	2.8707e-05	1.74314e-06	5.00954e-07	8.46162e-09	2.71929e-06
d5AT	0.11546	0.0290953	0.0353223	0.099848	-0.0124634	0.00847256	0.0388156	0.104287	0.206712	-0.25873	-0.116982	-0.38673	0.750827	0.684638	0.386119	0.734546	0.434489	0.649891	0.502629	0.64396	0.673003		2.4832e-11	2.07522e-09	4.46014e-23	1.88945e-21	2.90276e-16	1.4071e-21	3.11032e-13	8.00097e-22	1.9052e-19	1.88945e-21	5.99309e-19	9.57005e-22	3.55647e-13
THS	0.0152831	-0.01711	-0.200368	-0.221547	-0.0857064	-0.249705	-0.167625	-0.20835	-0.000122293	-0.0889949	-0.110123	-0.595367	0.432718	0.362143	0.338351	0.589223	0.414613	0.552691	0.494001	0.469985	0.387693	0.517343		2.19275e-22	6.87253e-06	1.18643e-24	9.09253e-30	3.63999e-38	1.51113e-21	3.71867e-23	1.16558e-20	1.69683e-24	8.66247e-28	1.40017e-31	5.58097e-19
11OPT	-0.156243	-0.272567	-0.133994	-0.128148	-0.0407831	-0.0719184	0.0125761	-0.099506	-0.204013	-0.159811	-0.196801	-0.875712	0.421645	0.36743	0.343651	0.464422	0.396128	0.587028	0.54315	0.458472	0.401651	0.472673	0.692639		0.00210184	3.76207e-09	2.17018e-07	4.43837e-11	1.45024e-05	1.25206e-08	3.19425e-10	4.27126e-09	2.69873e-09	9.82125e-13	5.62023e-08
d5PT	0.184109	0.0844412	0.0882588	0.0688203	-0.0373817	0.0549135	0.0438752	0.390025	0.329861	-0.252759	-0.172054	-0.078042	0.77341	0.655835	0.584665	0.548298	0.385528	0.577	0.513328	0.676706	0.850984	0.70062	0.367144	0.261733		3.38753e-10	3.71156e-09	2.60181e-15	1.03644e-07	3.05243e-09	2.81925e-08	4.82044e-09	9.29936e-11	9.95387e-11	3.3514e-09
THE	-0.0596877	0.0333833	0.0619913	0.0436509	0.101966	-0.0424226	-0.00219162	-0.108269	-0.00608642	0.0426278	0.105813	-0.284037	0.59519	0.597687	0.154223	0.793578	0.485182	0.304731	0.486818	0.672497	0.382929	0.681267	0.717841	0.465766	0.491691		2.52658e-43	8.58304e-27	1.78367e-23	7.6012e-69	1.37669e-45	5.54543e-58	5.73163e-67	1.22966e-35	2.47377e-26
THA	0.0152413	0.112942	-0.056721	-0.135161	-0.0204561	-0.240387	-0.124332	-0.183036	0.0548156	0.0598219	0.10532	-0.268998	0.519139	0.533649	0.15878	0.695521	0.503238	0.33898	0.500801	0.542629	0.365899	0.609365	0.765934	0.416541	0.465972	0.853582		3.43541e-40	6.90099e-36	3.16217e-36	9.65469e-29	8.7986e-30	5.29265e-36	3.97763e-25	2.53949e-20
THB	0.110164	-0.0144954	-0.0653314	-0.108785	0.0157704	-0.131149	-0.112209	-0.0157318	0.0956048	-0.0769911	-0.0399024	-0.348454	0.590806	0.578232	0.402453	0.686718	0.577377	0.549422	0.572015	0.61131	0.549991	0.682982	0.825769	0.511859	0.593714	0.739244	0.837368		5.66061e-30	1.09704e-28	1.11862e-23	3.48808e-26	1.7901e-27	1.60877e-32	2.48253e-20
aTHB	0.16535	0.161101	-0.184607	-0.237283	-0.160959	-0.307859	-0.244477	-0.156211	0.280361	0.0566141	0.0412955	-0.278997	0.517557	0.433349	0.211576	0.700354	0.492513	0.35454	0.446328	0.468448	0.310517	0.55651	0.682548	0.35547	0.42589	0.705158	0.811434	0.767791		1.69683e-24	7.77485e-29	1.87086e-17	8.76343e-20	3.20103e-18	6.21906e-15
THF	0.0210823	0.0751332	0.0321873	0.0696584	0.0537104	-0.00128243	-0.00778196	-0.0825298	0.0764142	0.0286416	0.0764519	-0.280416	0.5475	0.537738	0.161215	0.819966	0.460348	0.294377	0.440055	0.631501	0.354214	0.686058	0.701557	0.451933	0.468198	0.936657	0.813811	0.756393	0.716099		6.3917e-57	3.41088e-74	5.67795e-62	1.53506e-49	2.91231e-24
aTHF	0.0967439	0.146564	-0.175997	-0.0748155	-0.132537	-0.201452	-0.10322	-0.0922195	0.120336	0.0284471	0.0464992	-0.334418	0.596106	0.398773	0.233255	0.891658	0.471973	0.35313	0.374484	0.589709	0.344354	0.655503	0.671209	0.492335	0.442194	0.864156	0.75695	0.707399	0.757835	0.906494		1.9009e-51	3.81961e-40	1.89208e-47	3.25364e-23
aCL	0.013671	0.0563708	-0.0420793	0.0320454	0.0393916	-0.0525794	0.0385588	-0.0803584	0.0280333	-0.0313904	0.0232257	-0.280327	0.531676	0.45631	0.230679	0.805351	0.412307	0.373512	0.377323	0.555304	0.388018	0.68127	0.716159	0.464271	0.462895	0.909763	0.766144	0.733212	0.627577	0.947185	0.888264		8.31614e-66	4.26947e-71	3.15266e-21
bCL	-0.0828216	0.0514136	0.0731988	0.0640738	0.163296	0.00400972	-0.00254262	-0.10953	2.82214e-05	0.033658	0.0690844	-0.271383	0.551712	0.541878	0.167034	0.765011	0.441632	0.329111	0.442211	0.615423	0.405377	0.648725	0.748425	0.469637	0.504765	0.932556	0.812281	0.74553	0.660001	0.920639	0.836993	0.929839		5.66089e-47	4.74121e-21
aC	0.068711	0.0645075	-0.187887	-0.0776719	-0.0498365	-0.132013	-0.0434386	-0.0542503	0.0617579	-0.0763666	-0.0291013	-0.365376	0.554006	0.409455	0.374616	0.796706	0.435669	0.517984	0.378887	0.547599	0.45651	0.685082	0.780622	0.546248	0.504055	0.809718	0.722695	0.787683	0.638595	0.881025	0.872397	0.941283	0.870274		1.22644e-22
F	-0.036965	0.054027	-0.0101278	0.0690181	0.0579488	0.00583374	0.0267411	0.0531531	0.0719543	0.0124087	0.0192013	-0.269665	0.579689	0.473393	0.315914	0.731878	0.447689	0.391645	0.387751	0.5397	0.381268	0.555355	0.649203	0.433678	0.467133	0.734786	0.666886	0.667073	0.587211	0.713607	0.702263	0.678488	0.676228	0.695619

## Sheet: Supplement Table S2 U16 woman
	STAI state	STAI trait	Effective intrinsic	Cognitive intrinsic	Integrated	Identified	Introjected	External	Amotivation	VPh	VC	Creatinine	An	Et	DHEA	11OHAn	11OHEt	16OHDHEA	PD	PT	d5PD	d5AT	THS	11OPT	d5PT	THE	THA	THB	aTHB	THF	aTHF	aCL	bCL	aC	F
STAI state		1.40363e-08	0.00283697	0.027393	0.011361	0.00756558	0.708692	0.41131	0.0218759	0.0684418	0.00540494	0.021758	0.960787	0.819959	0.241916	0.561189	0.00173148	0.00491077	0.063421	0.197488	0.0542889	0.00180759	0.448434	0.0730108	0.547002	0.981927	0.871201	0.22681	0.901079	0.770458	0.892194	0.913699	0.891908	0.573732	0.810594
STAI trait	0.714114		0.0117969	0.0690926	0.00479424	0.00468437	0.562459	0.0114313	0.00377783	0.0690926	0.0284343	0.450604	0.901079	0.684555	0.0895806	0.901079	0.0847172	0.0123264	0.447995	0.685842	0.15456	0.0070261	0.593183	0.825537	0.729648	0.487255	0.281351	0.892194	0.901079	0.726171	0.581608	0.630501	0.563697	0.752311	0.463322
Effective intrinsic	-0.443809	-0.386432		5.88693e-13	1.13524e-05	6.90776e-06	0.254716	0.0601911	0.206277	0.573798	0.332565	0.155257	0.53683	0.729648	0.0560065	0.63872	0.615822	0.00346418	0.0210853	0.0890878	0.00181035	0.0843026	0.92008	0.799737	0.137996	0.913699	0.752311	0.394435	0.44824	0.844578	0.95213	0.901079	0.807557	0.995184	0.890755
Cognitive intrinsic	-0.346593	-0.296044	0.759766		1.30559e-06	1.39387e-08	0.201043	0.0966076	0.0308684	0.197979	0.127033	0.1303	0.849179	0.4745	0.696728	0.871201	0.512179	0.408515	0.942437	0.990215	0.201043	0.802164	0.780629	0.487255	0.994906	0.824296	0.675079	0.849179	0.274874	0.825265	0.620754	0.919678	0.643861	0.990215	0.995184
Integrated	-0.388286	-0.423863	0.532601	0.574899		8.42905e-09	0.981927	0.193194	0.0423082	0.0736118	0.0914659	0.766996	0.770458	0.911739	0.155257	0.359522	0.981927	0.198209	0.799737	0.707368	0.102939	0.881356	0.904966	0.81031	0.844578	0.793198	0.913213	0.927561	0.552754	0.32748	0.359532	0.675079	0.845834	0.533575	0.507707
Identified	-0.405165	-0.424862	0.542609	0.645789	0.652908		0.512179	0.107353	0.00653141	0.0896151	0.0376351	0.254716	0.819959	0.810594	0.48398	0.198209	0.824296	0.74447	0.752929	0.325563	0.402544	0.933034	0.901079	0.476077	0.436833	0.752311	0.805973	0.99034	0.643861	0.41131	0.460996	0.995184	0.758138	0.752929	0.404736
Introjected	-0.0880492	0.121858	0.178363	0.194034	-0.00868361	0.117274		0.562459	0.202039	0.995184	0.788145	0.745522	0.675079	0.386243	0.569734	0.761377	0.906539	0.990215	0.747557	0.757439	0.853439	0.845834	0.946474	0.990441	0.915134	0.730435	0.819959	0.718147	0.403308	0.855023	0.675079	0.865876	0.776418	0.788145	0.995184
External	0.16163	0.387868	-0.26636	-0.239643	-0.19765	-0.233603	0.106036		3.2475e-06	0.511858	0.801892	0.752929	0.833286	0.913699	0.433658	0.631876	0.496712	0.17509	0.994906	0.978427	0.275646	0.474965	0.911739	0.990215	0.995184	0.803034	0.799396	0.583238	0.552754	0.980361	0.92008	0.752929	0.460996	0.934158	0.543415
Amotivation	0.357352	0.433303	-0.192138	-0.298122	-0.283534	-0.361592	0.193561	0.557667		0.432788	0.0141618	0.039936	0.666444	0.871201	0.0466579	0.633376	0.111172	0.0456643	0.508987	0.913699	0.0862127	0.889573	0.0949587	0.155024	0.990215	0.663134	0.74133	0.272076	0.824473	0.890755	0.990215	0.95629	0.786173	0.927561	0.801892
VPh	0.296922	0.296134	-0.103241	-0.195845	-0.255292	-0.244233	0.00128428	-0.11795	0.136316		1.4857e-19	0.0053412	0.895204	0.914449	0.926685	0.469328	0.346493	0.608616	0.533575	0.901628	0.421859	0.514052	0.0139571	0.00315323	0.99034	0.512179	0.707368	0.514724	0.098881	0.730435	0.726571	0.643861	0.990215	0.675079	0.656183
VC	0.419024	0.344714	-0.158881	-0.224273	-0.242883	-0.289194	-0.0575482	0.0540207	0.331768	0.73876		0.00033965	0.511137	0.569734	0.871201	0.0944709	0.0909883	0.193194	0.117388	0.516951	0.212067	0.183916	0.00421785	0.000512625	0.990215	0.412292	0.776587	0.156858	0.0863175	0.533575	0.375781	0.516951	0.770458	0.272722	0.552754
Creatinine	0.379911	0.161621	-0.228132	-0.239346	-0.0673433	-0.19162	0.0737377	0.0704582	0.307439	0.30605	0.378843		0.0895806	0.718147	0.929649	0.0466347	0.193194	0.0102511	0.0293414	0.496841	0.000897114	0.145416	8.09498e-07	1.62469e-41	0.700514	0.403308	0.637513	0.47049	0.0236426	0.901079	0.0219562	0.499062	0.596863	0.0895806	0.198209
An	-0.0160717	-0.0352157	0.121271	0.0456637	-0.0666814	-0.0535623	-0.090381	-0.0498747	-0.0925722	-0.0259287	-0.0975532	-0.202362		2.17468e-26	1.41728e-06	1.50811e-12	4.40629e-06	3.62403e-05	2.4621e-08	7.41495e-15	8.15923e-11	8.68135e-05	6.30106e-05	0.00667883	1.90033e-13	4.49997e-10	2.97071e-09	2.78928e-10	3.93289e-06	5.25575e-09	1.98041e-07	2.54583e-09	2.11348e-07	3.74973e-09	4.75662e-14
Et	-0.0603309	-0.099716	0.0780856	-0.137363	-0.0280273	-0.0556057	-0.15949	0.0270944	-0.0405603	-0.0196621	-0.0859922	0.0614719	0.84397		6.04227e-10	1.09647e-05	1.09757e-08	6.85947e-06	4.77989e-10	2.48659e-12	2.60147e-09	1.3641e-05	0.0728202	0.799737	4.64157e-13	1.15868e-05	2.00287e-06	7.02909e-09	0.0620358	2.43021e-06	0.0671293	7.32163e-05	0.000395235	0.000407968	3.73834e-09
DHEA	-0.222161	-0.29785	0.292126	0.0859717	0.229967	0.134989	-0.113428	-0.147576	-0.301419	0.0169818	-0.0306167	-0.0160173	0.486902	0.593618		0.722104	0.00364726	1.24081e-12	9.52912e-07	0.0145039	6.08663e-15	0.0219562	0.906539	0.990215	1.26116e-11	0.901079	0.107353	0.000741075	0.857088	0.915134	0.463322	0.83971	0.990441	0.895204	0.00378649
11OHAn	-0.130676	-0.0355246	0.0985808	0.040277	-0.165678	-0.211865	0.0690471	-0.10037	-0.0998974	-0.10544	-0.199588	-0.231181	0.655918	0.450897	0.0608287		2.79041e-09	0.00855743	0.000114081	1.70275e-13	0.000741075	7.61554e-08	3.93229e-09	0.00036023	9.41985e-06	5.53407e-16	8.56142e-11	2.26102e-11	1.58901e-16	3.74719e-22	1.35205e-26	2.26559e-14	1.7188e-13	1.61926e-19	1.25564e-12
11OHEt	-0.487778	-0.302113	0.103867	-0.127735	-0.00997425	-0.0523549	-0.0292757	-0.132058	-0.251007	-0.12849	-0.201436	-0.163562	0.467186	0.556957	0.319184	0.575238		3.80704e-06	1.22754e-07	1.61566e-10	2.7771e-06	2.16888e-11	0.000175631	0.0125959	2.15415e-05	0.000178475	0.000101923	2.67159e-10	0.00109727	6.88373e-07	0.00110403	0.0010861	0.000225529	2.12681e-06	0.00122992
16OHDHEA	-0.448093	-0.407946	0.414664	0.15374	0.211728	0.0748015	0.00557484	-0.221286	-0.302955	-0.0799205	-0.163411	-0.286827	0.428324	0.459369	0.658033	0.292468	0.469957		2.75681e-14	6.00703e-06	4.23959e-20	3.90621e-14	0.346493	0.0165854	6.10866e-13	0.664139	0.272722	0.000145784	0.159355	0.752929	0.715354	0.987674	0.627448	0.350231	0.0170529
PD	-0.320384	-0.162919	0.340751	0.0182655	0.0595037	-0.0719841	-0.0738433	-0.00254495	-0.129006	-0.0928445	-0.189162	-0.249326	0.546357	0.596314	0.493408	0.404799	0.524255	0.692109		1.90509e-17	4.87159e-13	1.09683e-10	0.0129149	0.0145181	2.60374e-10	0.00197283	0.000613863	2.23897e-06	0.00468314	0.00639388	0.159953	0.0421856	0.0182279	0.0167952	0.000391215
PT	-0.239531	-0.0992217	0.265633	0.00609882	-0.0836159	-0.174403	-0.0701371	-0.0111109	-0.0263578	-0.0233849	-0.0954084	-0.100148	0.702486	0.65133	0.274991	0.676883	0.608782	0.461744	0.744143		4.94739e-09	3.36922e-12	0.000102881	0.0466579	2.95788e-15	7.08679e-10	3.60589e-08	1.50811e-12	1.25641e-06	7.79938e-13	3.10265e-08	8.89413e-09	1.03497e-08	1.73158e-11	7.11943e-07
d5PD	-0.329842	-0.259731	0.436303	0.210487	0.255819	0.155795	-0.0447545	-0.186805	-0.267736	-0.114238	-0.157237	-0.356648	0.616475	0.576178	0.704106	0.36141	0.475473	0.780383	0.667075	0.567508		6.7978e-09	0.000470422	0.000331844	1.64293e-18	0.00556157	2.77939e-05	6.88864e-10	0.000897114	0.0336846	0.0542889	0.021758	0.00236832	0.00134964	3.84802e-05
d5AT	-0.48617	-0.43272	0.269281	-0.0583877	0.0384055	-0.0203103	0.0466854	-0.137055	-0.0368817	-0.0963067	-0.166201	-0.179011	0.410662	0.446691	0.259802	0.530934	0.630179	0.689252	0.613185	0.648324	0.563426		0.155831	0.0427646	2.9885e-09	0.0422432	0.164709	5.34861e-06	0.0329314	0.000654333	0.0158737	0.0620358	0.0347431	0.000654333	0.00804743
THS	-0.162325	0.122143	0.0237101	0.0643936	-0.030047	0.0321684	0.0173474	-0.0279323	-0.260763	-0.276455	-0.314728	-0.496017	0.417229	0.212171	-0.0222758	0.5706	0.395411	0.128596	0.278998	0.407013	0.372665	0.17509		3.19437e-13	0.161572	8.19524e-18	1.01073e-17	5.2639e-12	6.02966e-14	1.86413e-11	7.61143e-14	8.29109e-13	7.27543e-16	3.43912e-17	6.97767e-07
11OPT	-0.311297	-0.0579514	0.0600017	0.133988	-0.0561479	0.13663	0.00404877	-0.00626926	-0.230439	-0.32333	-0.370599	-0.931156	0.300322	0.0451577	-0.00465059	0.379233	0.279901	0.270093	0.27483	0.230934	0.38141	0.234632	0.67107		0.987674	0.00399449	0.0152871	0.0100032	0.000465523	0.0293414	4.35786e-05	0.00551122	0.00833891	4.80879e-05	0.0165047
d5PT	-0.134385	-0.088101	0.237905	0.00278626	-0.0473855	-0.146755	-0.0252892	-0.00083797	0.00687734	0.00335665	-0.00390535	0.0646259	0.675671	0.667631	0.635782	0.453667	0.438219	0.664861	0.603364	0.709672	0.759382	0.574199	0.172814	0.00623377		0.00122992	1.47095e-05	1.21541e-10	0.000145506	0.000334466	0.00653161	0.00152481	0.000646299	0.000154036	3.8203e-06
THE	-0.0109412	0.151118	0.0263068	0.0522579	-0.0614924	-0.0723865	-0.0774249	-0.0580061	-0.0935638	-0.0968216	-0.115822	-0.118009	0.597093	0.449697	0.0238714	0.721694	0.394954	0.0707236	0.335894	0.591614	0.306036	0.235349	0.749808	0.316339	0.348411		5.51874e-28	2.9982e-12	4.82822e-11	4.29541e-29	1.14967e-20	8.50501e-32	6.44973e-38	4.08357e-22	1.48865e-10
THA	0.0454336	0.208637	0.0727377	0.0900892	-0.027437	-0.0573086	-0.053506	-0.0603028	-0.0755228	-0.0634661	-0.0495112	-0.0751639	0.574385	0.4812	0.193321	0.615857	0.407322	0.143216	0.366357	0.541051	0.433408	0.171763	0.748361	0.273074	0.445232	0.856982		7.59934e-21	8.20583e-17	9.93966e-20	2.41894e-13	3.44028e-20	9.7789e-29	7.63635e-19	2.10638e-10
THB	-0.22723	-0.0397258	0.157624	0.0457566	0.0217196	-0.00464413	0.0810688	-0.110084	-0.188535	-0.0960461	-0.174637	-0.105108	0.602387	0.562907	0.361373	0.629647	0.602968	0.39953	0.479184	0.655968	0.592047	0.463822	0.644106	0.287693	0.611998	0.649511	0.78966		3.43887e-13	2.12944e-14	1.40052e-09	1.7058e-10	1.22167e-12	1.86625e-17	4.07233e-09
aTHB	-0.0372123	0.0369456	0.144177	0.187206	-0.117547	-0.0970624	0.155348	-0.11744	-0.0519799	-0.197248	-0.204455	-0.257192	0.46919	0.219419	0.0331354	0.730179	0.351552	0.173754	0.311725	0.489017	0.356623	0.245046	0.685529	0.373024	0.399691	0.621905	0.734632	0.670303		1.22167e-12	3.97954e-19	1.4839e-09	3.32523e-11	4.96619e-15	1.21884e-09
THF	-0.0758463	0.089522	-0.0476056	-0.0516078	-0.173757	-0.152792	0.0442561	0.0105212	0.036178	-0.0587569	-0.092749	-0.0237848	0.566667	0.477749	-0.0193445	0.80449	0.498825	0.053927	0.301954	0.662622	0.244119	0.364626	0.631775	0.24945	0.381113	0.866073	0.775745	0.694422	0.658442		7.06919e-27	1.5332e-28	4.04281e-28	2.53871e-34	3.94785e-09
aTHF	-0.0399321	0.124799	0.0161674	0.102844	-0.165461	-0.140934	0.0900384	-0.0239287	0.00505405	-0.0599419	-0.123087	-0.25979	0.517304	0.215943	-0.106444	0.845863	0.35128	0.0621645	0.173432	0.543241	0.22496	0.27175	0.683525	0.424589	0.301088	0.787396	0.673531	0.583698	0.767693	0.848336		1.13725e-22	6.56262e-21	3.36876e-35	3.20378e-08
aCL	0.0302272	0.113802	-0.031191	0.0243024	-0.0907626	0.000835944	-0.042076	-0.0714757	0.0152261	-0.0738773	-0.095489	-0.0996784	0.576549	0.414162	0.0368955	0.693779	0.351923	0.0060235	0.235535	0.55979	0.260482	0.219295	0.661954	0.306419	0.34287	0.884428	0.78167	0.608089	0.582919	0.861558	0.810019		3.18202e-30	1.27534e-30	1.99668e-06
bCL	-0.0403648	0.129433	0.0568176	0.0972406	-0.0467329	-0.0697858	-0.0655278	-0.141151	-0.0633035	-0.00379717	-0.0507758	-0.0815461	0.516265	0.376933	0.00291899	0.676648	0.389882	0.0770934	0.266667	0.557798	0.331082	0.242894	0.719654	0.293358	0.365046	0.916549	0.863253	0.658306	0.625739	0.858244	0.790612	0.873927		5.00517e-26	3.08716e-06
aC	-0.126781	0.0817374	-0.00129834	0.00541773	-0.122053	-0.0711171	0.0627559	-0.019863	-0.0219115	-0.0683863	-0.143091	-0.202412	0.57128	0.376104	0.0259493	0.772752	0.480124	0.127706	0.269561	0.632616	0.346011	0.364515	0.740309	0.422585	0.398268	0.803859	0.763896	0.744453	0.705764	0.898689	0.903636	0.876858	0.840792		1.4998e-07
F	-0.0630083	0.158056	0.0361874	0.00215277	-0.129455	-0.154702	-0.00081019	0.119925	-0.0588889	-0.0720303	-0.0892735	-0.161433	0.687553	0.57143	0.317916	0.657795	0.34849	0.268943	0.377283	0.498082	0.427073	0.294531	0.498503	0.270379	0.469785	0.609762	0.605741	0.569958	0.5854	0.570441	0.542712	0.481366	0.473633	0.521344
STAI state
STAI trait
Effective intrinsic
Cognitive intrinsic
Integrated
Identified
Introjected
External
Amotivation
VPh
VC
Creatinine
An
Et
DHEA
11OHAn
11OHEt
16OHDHEA
PD
PT
d5PD
d5AT
THS
11OPT
d5PT
THE
THA
THB
aTHB
THF
aTHF
aCL
bCL
aC
F
STAI state
STAI trait
Effective intrinsic
Cognitive intrinsic
Integrated
Identified
Introjected
External
Amotivation
VPh
VC
Creatinine
An
Et
DHEA
11OHAn
11OHEt
16OHDHEA
PD
PT
d5PD
d5AT
THS
11OPT
d5PT
THE
THA
THB
aTHB
THF
aTHF
aCL
bCL
aC
F
STAI state
STAI trait
Effective intrinsic
Cognitive intrinsic
Integrated
Identified
Introjected
External
Amotivation
VPh
VC
Creatinine
An
Et
DHEA
11OHAn
11OHEt
16OHDHEA
PD
PT
d5PD
d5AT
THS
11OPT
d5PT
THE
THA
THB
aTHB
THF
aTHF
aCL
bCL
aC
F
STAI state
STAI trait
Effective intrinsic
Cognitive intrinsic
Integrated
Identified
Introjected
External
Amotivation
VPh
VC
Creatinine
An
Et
DHEA
11OHAn
11OHEt
16OHDHEA
PD
PT
d5PD
d5AT
THS
11OPT
d5PT
THE
THA
THB
aTHB
THF
aTHF
aCL
bCL
aC
F
STAI state
STAI trait
Effective intrinsic
Cognitive intrinsic
Integrated
Identified
Introjected
External
Amotivation
VPh
VC
Creatinine
An
Et
DHEA
11OHAn
11OHEt
16OHDHEA
PD
PT
d5PD
d5AT
THS
11OPT
d5PT
THE
THA
THB
aTHB
THF
aTHF
aCL
bCL
aC
F
STAI state
STAI trait
Effective intrinsic
Cognitive intrinsic
Integrated
Identified
Introjected
External
Amotivation
VPh
VC
Creatinine
An
Et
DHEA
11OHAn
11OHEt
16OHDHEA
PD
PT
d5PD
d5AT
THS
11OPT
d5PT
THE
THA
THB
aTHB
THF
aTHF
aCL
bCL
aC
F
STAI state
STAI trait
Effective intrinsic
Cognitive intrinsic
Integrated
Identified
Introjected
External
Amotivation
VPh
VC
Creatinine
An
Et
DHEA
11OHAn
11OHEt
16OHDHEA
PD
PT
d5PD
d5AT
THS
11OPT
d5PT
THE
THA
THB
aTHB
THF
aTHF
aCL
bCL
aC
F
STAI state
STAI trait
Effective intrinsic
Cognitive intrinsic
Integrated
Identified
Introjected
External
Amotivation
VPh
VC
Creatinine
An
Et
DHEA
11OHAn
11OHEt
16OHDHEA
PD
PT
d5PD
d5AT
THS
11OPT
d5PT
THE
THA
THB
aTHB
THF
aTHF
aCL
bCL
aC
F
STAI state
STAI trait
Effective intrinsic
Cognitive intrinsic
Integrated
Identified
Introjected
External
Amotivation
VPh
VC
Creatinine
An
Et
DHEA
11OHAn
11OHEt
16OHDHEA
PD
PT
d5PD
d5AT
THS
11OPT
d5PT
THE
THA
THB
aTHB
THF
aTHF
aCL
bCL
aC
F
STAI state
STAI trait
Effective intrinsic
Cognitive intrinsic
Integrated
Identified
Introjected
External
Amotivation
VPh
VC
Creatinine
An
Et
DHEA
11OHAn
11OHEt
16OHDHEA
PD
PT
d5PD
d5AT
THS
11OPT
d5PT
THE
THA
THB
aTHB
THF
aTHF
aCL
bCL
aC
F
STAI state
STAI trait
Effective intrinsic
Cognitive intrinsic
Integrated
Identified
Introjected
External
Amotivation
VPh
VC
Creatinine
An
Et
DHEA
11OHAn
11OHEt
16OHDHEA
PD
PT
d5PD
d5AT
THS
11OPT
d5PT
THE
THA
THB
aTHB
THF
aTHF
aCL
bCL
aC
F
STAI state
STAI trait
Effective intrinsic
Cognitive intrinsic
Integrated
Identified
Introjected
External
Amotivation
VPh
VC
Creatinine
An
Et
DHEA
11OHAn
11OHEt
16OHDHEA
PD
PT
d5PD
d5AT
THS
11OPT
d5PT
THE
THA
THB
aTHB
THF
aTHF
aCL
bCL
aC
F
STAI state
STAI trait
Effective intrinsic
Cognitive intrinsic
Integrated
Identified
Introjected
External
Amotivation
VPh
VC
Creatinine
An
Et
DHEA
11OHAn
11OHEt
16OHDHEA
PD
PT
d5PD
d5AT
THS
11OPT
d5PT
THE
THA
THB
aTHB
THF
aTHF
aCL
bCL
aC
F
STAI state
STAI trait
Effective intrinsic
Cognitive intrinsic
Integrated
Identified
Introjected
External
Amotivation
VPh
VC
Creatinine
An
Et
DHEA
11OHAn
11OHEt
16OHDHEA
PD
PT
d5PD
d5AT
THS
11OPT
d5PT
THE
THA
THB
aTHB
THF
aTHF
aCL
bCL
aC
F
STAI state
STAI trait
Effective intrinsic
Cognitive intrinsic
Integrated
Identified
Introjected
External
Amotivation
VPh
VC
Creatinine
An
Et
DHEA
11OHAn
11OHEt
16OHDHEA
PD
PT
d5PD
d5AT
THS
11OPT
d5PT
THE
THA
THB
aTHB
THF
aTHF
aCL
bCL
aC
F
STAI state
STAI trait
Effective intrinsic
Cognitive intrinsic
Integrated
Identified
Introjected
External
Amotivation
VPh
VC
Creatinine
An
Et
DHEA
11OHAn
11OHEt
16OHDHEA
PD
PT
d5PD
d5AT
THS
11OPT
d5PT
THE
THA
THB
aTHB
THF
aTHF
aCL
bCL
aC
F
STAI state
STAI trait
Effective intrinsic
Cognitive intrinsic
Integrated
Identified
Introjected
External
Amotivation
VPh
VC
Creatinine
An
Et
DHEA
11OHAn
11OHEt
16OHDHEA
PD
PT
d5PD
d5AT
THS
11OPT
d5PT
THE
THA
THB
aTHB
THF
aTHF
aCL
bCL
aC
F
STAI state
STAI trait
Effective intrinsic
Cognitive intrinsic
Integrated
Identified
Introjected
External
Amotivation
VPh
VC
Creatinine
An
Et
DHEA
11OHAn
11OHEt
16OHDHEA
PD
PT
d5PD
d5AT
THS
11OPT
d5PT
THE
THA
THB
aTHB
THF
aTHF
aCL
bCL
aC
F
STAI state
STAI trait
Effective intrinsic
Cognitive intrinsic
Integrated
Identified
Introjected
External
Amotivation
VPh
VC
Creatinine
An
Et
DHEA
11OHAn
11OHEt
16OHDHEA
PD
PT
d5PD
d5AT
THS
11OPT
d5PT
THE
THA
THB
aTHB
THF
aTHF
aCL
bCL
aC
F
STAI state
STAI trait
Effective intrinsic
Cognitive intrinsic
Integrated
Identified
Introjected
External
Amotivation
VPh
VC
Creatinine
An
Et
DHEA
11OHAn
11OHEt
16OHDHEA
PD
PT
d5PD
d5AT
THS
11OPT
d5PT
THE
THA
THB
aTHB
THF
aTHF
aCL
bCL
aC
F
STAI state
STAI trait
Effective intrinsic
Cognitive intrinsic
Integrated
Identified
Introjected
External
Amotivation
VPh
VC
Creatinine
An
Et
DHEA
11OHAn
11OHEt
16OHDHEA
PD
PT
d5PD
d5AT
THS
11OPT
d5PT
THE
THA
THB
aTHB
THF
aTHF
aCL
bCL
aC
F
STAI state
STAI trait
Effective intrinsic
Cognitive intrinsic
Integrated
Identified
Introjected
External
Amotivation
VPh
VC
Creatinine
An
Et
DHEA
11OHAn
11OHEt
16OHDHEA
PD
PT
d5PD
d5AT
THS
11OPT
d5PT
THE
THA
THB
aTHB
THF
aTHF
aCL
bCL
aC
F
STAI state
STAI trait
Effective intrinsic
Cognitive intrinsic
Integrated
Identified
Introjected
External
Amotivation
VPh
VC
Creatinine
An
Et
DHEA
11OHAn
11OHEt
16OHDHEA
PD
PT
d5PD
d5AT
THS
11OPT
d5PT
THE
THA
THB
aTHB
THF
aTHF
aCL
bCL
aC
F
STAI state
STAI trait
Effective intrinsic
Cognitive intrinsic
Integrated
Identified
Introjected
External
Amotivation
VPh
VC
Creatinine
An
Et
DHEA
11OHAn
11OHEt
16OHDHEA
PD
PT
d5PD
d5AT
THS
11OPT
d5PT
THE
THA
THB
aTHB
THF
aTHF
aCL
bCL
aC
F
STAI state
STAI trait
Effective intrinsic
Cognitive intrinsic
Integrated
Identified
Introjected
External
Amotivation
VPh
VC
Creatinine
An
Et
DHEA
11OHAn
11OHEt
16OHDHEA
PD
PT
d5PD
d5AT
THS
11OPT
d5PT
THE
THA
THB
aTHB
THF
aTHF
aCL
bCL
aC
F
STAI state
STAI trait
Effective intrinsic
Cognitive intrinsic
Integrated
Identified
Introjected
External
Amotivation
VPh
VC
Creatinine
An
Et
DHEA
11OHAn
11OHEt
16OHDHEA
PD
PT
d5PD
d5AT
THS
11OPT
d5PT
THE
THA
THB
aTHB
THF
aTHF
aCL
bCL
aC
F
STAI state
STAI trait
Effective intrinsic
Cognitive intrinsic
Integrated
Identified
Introjected
External
Amotivation
VPh
VC
Creatinine
An
Et
DHEA
11OHAn
11OHEt
16OHDHEA
PD
PT
d5PD
d5AT
THS
11OPT
d5PT
THE
THA
THB
aTHB
THF
aTHF
aCL
bCL
aC
F
STAI state
STAI trait
Effective intrinsic
Cognitive intrinsic
Integrated
Identified
Introjected
External
Amotivation
VPh
VC
Creatinine
An
Et
DHEA
11OHAn
11OHEt
16OHDHEA
PD
PT
d5PD
d5AT
THS
11OPT
d5PT
THE
THA
THB
aTHB
THF
aTHF
aCL
bCL
aC
F
STAI state
STAI trait
Effective intrinsic
Cognitive intrinsic
Integrated
Identified
Introjected
External
Amotivation
VPh
VC
Creatinine
An
Et
DHEA
11OHAn
11OHEt
16OHDHEA
PD
PT
d5PD
d5AT
THS
11OPT
d5PT
THE
THA
THB
aTHB
THF
aTHF
aCL
bCL
aC
F
STAI state
STAI trait
Effective intrinsic
Cognitive intrinsic
Integrated
Identified
Introjected
External
Amotivation
VPh
VC
Creatinine
An
Et
DHEA
11OHAn
11OHEt
16OHDHEA
PD
PT
d5PD
d5AT
THS
11OPT
d5PT
THE
THA
THB
aTHB
THF
aTHF
aCL
bCL
aC
F
STAI state
STAI trait
Effective intrinsic
Cognitive intrinsic
Integrated
Identified
Introjected
External
Amotivation
VPh
VC
Creatinine
An
Et
DHEA
11OHAn
11OHEt
16OHDHEA
PD
PT
d5PD
d5AT
THS
11OPT
d5PT
THE
THA
THB
aTHB
THF
aTHF
aCL
bCL
aC
F
STAI state
STAI trait
Effective intrinsic
Cognitive intrinsic
Integrated
Identified
Introjected
External
Amotivation
VPh
VC
Creatinine
An
Et
DHEA
11OHAn
11OHEt
16OHDHEA
PD
PT
d5PD
d5AT
THS
11OPT
d5PT
THE
THA
THB
aTHB
THF
aTHF
aCL
bCL
aC
F
STAI state
STAI trait
Effective intrinsic
Cognitive intrinsic
Integrated
Identified
Introjected
External
Amotivation
VPh
VC
Creatinine
An
Et
DHEA
11OHAn
11OHEt
16OHDHEA
PD
PT
d5PD
d5AT
THS
11OPT
d5PT
THE
THA
THB
aTHB
THF
aTHF
aCL
bCL
aC
F
STAI state
STAI trait
Effective intrinsic
Cognitive intrinsic
Integrated
Identified
Introjected
External
Amotivation
VPh
VC
Creatinine
An
Et
DHEA
11OHAn
11OHEt
16OHDHEA
PD
PT
d5PD
d5AT
THS
11OPT
d5PT
THE
THA
THB
aTHB
THF
aTHF
aCL
bCL
aC
F
STAI state
STAI trait
Effective intrinsic
Cognitive intrinsic
Integrated
Identified
Introjected
External
Amotivation
VPh
VC
Creatinine
An
Et
DHEA
11OHAn
11OHEt
16OHDHEA
PD
PT
d5PD
d5AT
THS
11OPT
d5PT
THE
THA
THB
aTHB
THF
aTHF
aCL
bCL
aC
F
STAI state
STAI trait
Effective intrinsic
Cognitive intrinsic
Integrated
Identified
Introjected
External
Amotivation
VPh
VC
Creatinine
An
Et
DHEA
11OHAn
11OHEt
16OHDHEA
PD
PT
d5PD
d5AT
THS
11OPT
d5PT
THE
THA
THB
aTHB
THF
aTHF
aCL
bCL
aC
F
STAI state
STAI trait
Effective intrinsic
Cognitive intrinsic
Integrated
Identified
Introjected
External
Amotivation
VPh
VC
Creatinine
An
Et
DHEA
11OHAn
11OHEt
16OHDHEA
PD
PT
d5PD
d5AT
THS
11OPT
d5PT
THE
THA
THB
aTHB
THF
aTHF
aCL
bCL
aC
F
STAI state
STAI trait
Effective intrinsic
Cognitive intrinsic
Integrated
Identified
Introjected
External
Amotivation
VPh
VC
Creatinine
An
Et
DHEA
11OHAn
11OHEt
16OHDHEA
PD
PT
d5PD
d5AT
THS
11OPT
d5PT
THE
THA
THB
aTHB
THF
aTHF
aCL
bCL
aC
F
STAI state
STAI trait
Effective intrinsic
Cognitive intrinsic
Integrated
Identified
Introjected
External
Amotivation
VPh
VC
Creatinine
An
Et
DHEA
11OHAn
11OHEt
16OHDHEA
PD
PT
d5PD
d5AT
THS
11OPT
d5PT
THE
THA
THB
aTHB
THF
aTHF
aCL
bCL
aC
F
STAI state
STAI trait
Effective intrinsic
Cognitive intrinsic
Integrated
Identified
Introjected
External
Amotivation
VPh
VC
Creatinine
An
Et
DHEA
11OHAn
11OHEt
16OHDHEA
PD
PT
d5PD
d5AT
THS
11OPT
d5PT
THE
THA
THB
aTHB
THF
aTHF
aCL
bCL
aC
F
STAI state
STAI trait
Effective intrinsic
Cognitive intrinsic
Integrated
Identified
Introjected
External
Amotivation
VPh
VC
Creatinine
An
Et
DHEA
11OHAn
11OHEt
16OHDHEA
PD
PT
d5PD
d5AT
THS
11OPT
d5PT
THE
THA
THB
aTHB
THF
aTHF
aCL
bCL
aC
F
STAI state
STAI trait
Effective intrinsic
Cognitive intrinsic
Integrated
Identified
Introjected
External
Amotivation
VPh
VC
Creatinine
An
Et
DHEA
11OHAn
11OHEt
16OHDHEA
PD
PT
d5PD
d5AT
THS
11OPT
d5PT
THE
THA
THB
aTHB
THF
aTHF
aCL
bCL
aC
F
STAI state
STAI trait
Effective intrinsic
Cognitive intrinsic
Integrated
Identified
Introjected
External
Amotivation
VPh
VC
Creatinine
An
Et
DHEA
11OHAn
11OHEt
16OHDHEA
PD
PT
d5PD
d5AT
THS
11OPT
d5PT
THE
THA
THB
aTHB
THF
aTHF
aCL
bCL
aC
F
STAI state
STAI trait
Effective intrinsic
Cognitive intrinsic
Integrated
Identified
Introjected
External
Amotivation
VPh
VC
Creatinine
An
Et
DHEA
11OHAn
11OHEt
16OHDHEA
PD
PT
d5PD
d5AT
THS
11OPT
d5PT
THE
THA
THB
aTHB
THF
aTHF
aCL
bCL
aC
F
STAI state
STAI trait
Effective intrinsic
Cognitive intrinsic
Integrated
Identified
Introjected
External
Amotivation
VPh
VC
Creatinine
An
Et
DHEA
11OHAn
11OHEt
16OHDHEA
PD
PT
d5PD
d5AT
THS
11OPT
d5PT
THE
THA
THB
aTHB
THF
aTHF
aCL
bCL
aC
F
STAI state
STAI trait
Effective intrinsic
Cognitive intrinsic
Integrated
Identified
Introjected
External
Amotivation
VPh
VC
Creatinine
An
Et
DHEA
11OHAn
11OHEt
16OHDHEA
PD
PT
d5PD
d5AT
THS
11OPT
d5PT
THE
THA
THB
aTHB
THF
aTHF
aCL
bCL
aC
F
STAI state
STAI trait
Effective intrinsic
Cognitive intrinsic
Integrated
Identified
Introjected
External
Amotivation
VPh
VC
Creatinine
An
Et
DHEA
11OHAn
11OHEt
16OHDHEA
PD
PT
d5PD
d5AT
THS
11OPT
d5PT
THE
THA
THB
aTHB
THF
aTHF
aCL
bCL
aC
F
STAI state
STAI trait
Effective intrinsic
Cognitive intrinsic
Integrated
Identified
Introjected
External
Amotivation
VPh
VC
Creatinine
An
Et
DHEA
11OHAn
11OHEt
16OHDHEA
PD
PT
d5PD
d5AT
THS
11OPT
d5PT
THE
THA
THB
aTHB
THF
aTHF
aCL
bCL
aC
F
STAI state
STAI trait
Effective intrinsic
Cognitive intrinsic
Integrated
Identified
Introjected
External
Amotivation
VPh
VC
Creatinine
An
Et
DHEA
11OHAn
11OHEt
16OHDHEA
PD
PT
d5PD
d5AT
THS
11OPT
d5PT
THE
THA
THB
aTHB
THF
aTHF
aCL
bCL
aC
F
STAI state
STAI trait
Effective intrinsic
Cognitive intrinsic
Integrated
Identified
Introjected
External
Amotivation
VPh
VC
Creatinine
An
Et
DHEA
11OHAn
11OHEt
16OHDHEA
PD
PT
d5PD
d5AT
THS
11OPT
d5PT
THE
THA
THB
aTHB
THF
aTHF
aCL
bCL
aC
F
STAI state
STAI trait
Effective intrinsic
Cognitive intrinsic
Integrated
Identified
Introjected
External
Amotivation
VPh
VC
Creatinine
An
Et
DHEA
11OHAn
11OHEt
16OHDHEA
PD
PT
d5PD
d5AT
THS
11OPT
d5PT
THE
THA
THB
aTHB
THF
aTHF
aCL
bCL
aC
F
STAI state
STAI trait
Effective intrinsic
Cognitive intrinsic
Integrated
Identified
Introjected
External
Amotivation
VPh
VC
Creatinine
An
Et
DHEA
11OHAn
11OHEt
16OHDHEA
PD
PT
d5PD
d5AT
THS
11OPT
d5PT
THE
THA
THB
aTHB
THF
aTHF
aCL
bCL
aC
F
STAI state
STAI trait
Effective intrinsic
Cognitive intrinsic
Integrated
Identified
Introjected
External
Amotivation
VPh
VC
Creatinine
An
Et
DHEA
11OHAn
11OHEt
16OHDHEA
PD
PT
d5PD
d5AT
THS
11OPT
d5PT
THE
THA
THB
aTHB
THF
aTHF
aCL
bCL
aC
F
STAI state
STAI trait
Effective intrinsic
Cognitive intrinsic
Integrated
Identified
Introjected
External
Amotivation
VPh
VC
Creatinine
An
Et
DHEA
11OHAn
11OHEt
16OHDHEA
PD
PT
d5PD
d5AT
THS
11OPT
d5PT
THE
THA
THB
aTHB
THF
aTHF
aCL
bCL
aC
F
STAI state
STAI trait
Effective intrinsic
Cognitive intrinsic
Integrated
Identified
Introjected
External
Amotivation
VPh
VC
Creatinine
An
Et
DHEA
11OHAn
11OHEt
16OHDHEA
PD
PT
d5PD
d5AT
THS
11OPT
d5PT
THE
THA
THB
aTHB
THF
aTHF
aCL
bCL
aC
F
STAI state
STAI trait
Effective intrinsic
Cognitive intrinsic
Integrated
Identified
Introjected
External
Amotivation
VPh
VC
Creatinine
An
Et
DHEA
11OHAn
11OHEt
16OHDHEA
PD
PT
d5PD
d5AT
THS
11OPT
d5PT
THE
THA
THB
aTHB
THF
aTHF
aCL
bCL
aC
F
STAI state
STAI trait
Effective intrinsic
Cognitive intrinsic
[truncated: 241 more rows]

## Sheet: Supplement Table S2 U18 man
	STAI state	STAI trait	Effective intrinsic	Cognitive intrinsic	Integrated	Identified	Introjected	External	Amotivation	VPh	VC	Creatinine	An	Et	DHEA	11OHAn	11OHEt	16OHDHEA	PD	PT	d5PD	d5AT	THS	11OPT	d5PT	THE	THA	THB	aTHB	THF	aTHF	aCL	bCL	aC	F
STAI state		1.63793e-08	0.00523125	0.000609463	0.00191848	0.0120435	0.66069	0.259901	4.90052e-06	0.00681189	0.00105518	0.721165	0.991962	0.554785	0.237181	0.553884	0.419853	0.6439	0.903677	0.377966	0.524643	0.575564	0.540033	0.787105	0.411534	0.997788	0.991962	0.504393	0.630922	0.696173	0.17244	0.835519	0.892333	0.617822	0.910828
STAI trait	0.628919		0.101444	0.0579534	0.00861017	0.0679876	0.159885	0.304456	9.91041e-06	0.00289879	0.00131351	0.329418	0.386529	0.288447	0.23474	0.205626	0.189883	0.428324	0.366259	0.438384	0.404937	0.578521	0.00260655	0.0249152	0.265923	0.0105586	0.00537959	0.112789	0.244203	0.0358606	0.183111	0.0114834	0.00497308	0.0483645	0.297596
Effective intrinsic	-0.354182	-0.227571		6.51855e-13	1.01144e-09	9.89403e-12	2.01366e-08	0.0290276	1.6278e-06	0.810637	0.209038	0.339576	0.656585	0.915967	0.976902	0.879127	0.0231983	0.671236	0.20448	0.250353	0.272538	0.426704	0.807047	0.51023	0.412506	0.940326	0.575564	0.516153	0.765788	0.879127	0.47035	0.600414	0.839101	0.582822	0.910828
Cognitive intrinsic	-0.421159	-0.256694	0.664059		1.05697e-14	4.01772e-17	3.17741e-05	0.560488	1.81224e-06	0.97908	0.524643	0.661942	0.721165	0.723683	0.416071	0.785484	0.354551	0.694419	0.213811	0.17677	0.052301	0.849294	0.875922	0.851578	0.143199	0.627105	0.273881	0.108435	0.377966	0.339412	0.307003	0.229991	0.900156	0.15245	0.339412
Integrated	-0.387085	-0.336593	0.587011	0.699061		2.60809e-16	8.57655e-05	0.0108378	4.86874e-06	0.317939	0.17244	0.953814	0.335716	0.017039	0.903677	0.986032	0.797102	0.835519	0.693885	0.589139	0.694419	0.774843	0.614439	0.972123	0.686092	0.795887	0.879443	0.63821	0.671825	0.991962	0.393794	0.774843	0.339412	0.475684	0.911227
Identified	-0.323649	-0.248642	0.638227	0.739416	0.72663		0.00279307	0.0515157	0.000160586	0.991962	0.833324	0.377859	0.687858	0.139269	0.694419	0.671825	0.376824	0.814645	0.245848	0.140271	0.0912953	0.991962	0.26317	0.339412	0.143116	0.892333	0.297723	0.0882978	0.182469	0.380072	0.0981211	0.142871	0.915967	0.0223893	0.237899
Introjected	-0.0757728	0.200897	0.549262	0.428241	0.407742	0.322046		0.600414	0.112072	0.907511	0.163559	0.809092	0.775875	0.259214	0.169863	0.797102	0.00105161	0.355432	0.401156	0.377859	0.380569	0.991962	0.703216	0.991962	0.349882	0.690081	0.765788	0.879443	0.907511	0.986032	0.807047	0.614171	0.879127	0.899345	0.683463
External	0.167068	0.15484	-0.246187	-0.081062	-0.280862	-0.224019	0.0740658		0.0118295	0.337935	0.671825	0.532205	0.0206419	0.00324587	0.0418667	0.976902	0.671825	0.0644791	0.0830052	0.549603	0.0929598	0.807047	0.23474	0.803219	0.343545	0.868539	0.686092	0.984463	0.924708	0.768274	0.475684	0.671825	0.721165	0.516153	0.304456
Amotivation	0.534181	0.51989	-0.483258	-0.481425	-0.464287	-0.393948	-0.189378	0.277766		0.114071	0.0012661	0.77682	0.20794	0.443684	0.721165	0.991962	0.690081	0.991962	0.618599	0.879443	0.438384	0.971718	0.439105	0.694419	0.40899	0.750329	0.474933	0.655565	0.465402	0.797102	0.924708	0.839066	0.770553	0.991962	0.96943
VPh	0.344999	0.373858	-0.0369589	-0.0057003	-0.128947	-0.00205701	0.0190119	0.124556	0.18832		1.42592e-28	0.00184537	0.874418	0.953814	0.492939	0.380072	0.976902	0.155917	0.548602	0.962908	0.219922	0.0222409	0.896098	0.00473923	0.0214174	0.892333	0.344804	0.399107	0.386529	0.911227	0.580023	0.976902	0.77624	0.799944	0.896098
VC	0.405415	0.39871	-0.156055	-0.0872474	-0.166928	0.0336134	-0.16994	0.061971	0.343898	0.742244		0.0804413	0.731571	0.878108	0.354551	0.879127	0.924708	0.589139	0.280283	0.348689	0.0885338	0.225677	0.157262	0.213231	0.00788437	0.569131	0.0600088	0.0734267	0.125339	0.366259	0.833324	0.326532	0.329209	0.492939	0.492939
Creatinine	-0.0642951	-0.15428	0.127641	0.0662304	0.011148	-0.119044	0.0385943	0.088809	-0.0449948	0.27117	0.165493		1.16554e-06	0.000284607	0.000331361	6.38839e-06	0.00125233	1.55753e-13	5.00115e-11	0.000191345	0.000141887	9.21284e-08	6.00387e-10	4.79855e-51	0.0170803	2.32978e-05	0.000292754	6.0165e-05	0.0379065	0.00180387	0.00131351	0.000731103	0.000901178	8.01352e-05	5.39877e-06
An	-0.00212564	0.13748	-0.0672918	-0.0545173	-0.129287	-0.0610437	0.0454962	0.267219	0.161677	0.0217639	0.0409796	-0.40238		2.60507e-41	2.56303e-16	2.18323e-22	3.27558e-08	6.77014e-22	4.53432e-26	3.14897e-30	6.0426e-25	3.29479e-20	4.44298e-08	1.76925e-09	2.26375e-22	7.05421e-15	7.49136e-13	5.03673e-18	1.34695e-10	1.04366e-10	9.44687e-11	1.52904e-09	3.9666e-14	2.87191e-10	2.77245e-15
Et	0.100212	0.16534	-0.0173147	-0.0538468	-0.274128	-0.184793	0.147276	0.327827	0.10458	0.00870102	0.0210851	-0.310543	0.852587		1.05697e-14	4.45084e-13	1.76287e-10	8.52286e-20	5.42961e-33	5.54774e-23	1.2517e-20	2.36509e-17	3.51422e-08	2.07647e-07	8.20716e-17	2.86071e-13	2.17729e-12	2.07359e-14	6.8621e-05	7.58188e-10	2.62438e-05	9.03899e-08	5.93265e-13	3.72602e-07	3.39698e-13
DHEA	0.180636	0.181635	-0.00647131	0.110144	0.0205815	0.0589185	0.173525	0.239834	0.0546708	0.0746516	0.0966897	-0.30743	0.620534	0.593473		0.000112408	0.000903644	2.76819e-28	4.38665e-12	6.38839e-06	1.17293e-24	4.94662e-05	0.0113792	0.000127708	6.2925e-30	0.00235922	0.00169252	3.93071e-06	0.209222	0.00971174	0.0631705	0.0312874	0.0149472	0.0023542	2.60985e-05
11OHAn	-0.100562	0.191667	-0.026282	0.0437066	-0.00431509	0.0639876	0.0413368	0.00639825	0.00213614	-0.0918965	-0.0203639	-0.376951	0.703341	0.563484	0.328318		6.63943e-12	1.95344e-09	1.75223e-09	1.58467e-25	2.21104e-06	8.4643e-21	9.88026e-24	1.64975e-11	3.58088e-08	4.41314e-42	3.20875e-29	4.79308e-25	3.11647e-26	6.56516e-39	3.52419e-45	8.30135e-36	5.24818e-37	2.68403e-39	3.60065e-27
11OHEt	-0.129248	0.196945	0.262613	0.123984	0.0415027	0.119433	0.359843	0.0639075	-0.0603913	-0.00545234	-0.0121051	-0.27998	0.44949	0.50768	0.287033	0.539649		2.63664e-06	2.7803e-10	1.45486e-15	0.000205933	1.14066e-06	8.32682e-10	2.11401e-07	0.000428325	7.10456e-15	6.03932e-14	4.4188e-11	2.8991e-05	1.04654e-10	4.82231e-11	3.90934e-11	3.22554e-13	6.24497e-10	4.98254e-09
16OHDHEA	0.0819796	0.127252	0.0648371	0.0591198	-0.0340734	0.0375011	0.123671	0.221531	-0.0028331	-0.139269	-0.0610784	-0.572289	0.697467	0.670957	0.763429	0.481877	0.39043		2.91791e-21	7.33972e-12	1.1085e-26	3.03072e-26	4.32158e-08	5.29604e-13	6.98752e-25	1.40929e-07	4.72996e-09	8.17035e-13	0.000127708	5.26498e-05	0.000148323	7.66521e-05	1.33332e-05	4.5506e-07	6.00387e-10
PD	0.0243243	0.143569	0.162866	0.159595	-0.0597155	0.150575	0.113405	0.210218	0.0733982	0.0670789	0.110608	-0.520395	0.742745	0.801393	0.543378	0.483154	0.503026	0.689809		7.09737e-21	1.09328e-25	1.31691e-15	3.42523e-11	5.72549e-13	2.91844e-19	7.93574e-12	8.45181e-15	2.52352e-19	7.09325e-07	2.82116e-08	6.76914e-06	4.76266e-07	1.2306e-10	9.03899e-08	7.94413e-16
PT	-0.140139	0.124974	0.149402	0.17106	0.0785743	0.184305	0.11894	0.0858265	0.0254979	0.00758973	0.0978198	-0.318254	0.780168	0.710168	0.376901	0.73727	0.608252	0.538697	0.684966		1.04365e-12	5.54677e-22	2.37612e-17	1.03116e-10	6.00919e-13	2.76819e-28	3.7878e-26	8.55948e-29	1.08886e-17	1.39017e-24	1.59774e-21	3.15027e-21	1.58467e-25	1.9142e-22	2.63543e-19
d5PD	0.106479	0.133078	0.14379	0.230635	0.0590529	0.205624	0.117689	0.204686	0.105857	0.123194	0.161868	-0.323928	0.731237	0.681822	0.728203	0.393154	0.316685	0.748785	0.73894	0.555928		2.78039e-14	2.13641e-05	3.12044e-05	2.11616e-56	2.27021e-06	1.46438e-08	4.27403e-16	0.000193329	2.5669e-05	0.000327384	0.000192551	1.02326e-05	1.12037e-05	3.89884e-10
d5AT	-0.0959825	0.0952967	0.108095	0.0317369	-0.0458592	0.00321674	0.00161569	0.0390477	0.00817346	-0.207168	-0.121973	-0.436473	0.676397	0.636695	0.343055	0.683972	0.402742	0.744603	0.609011	0.698528	0.58603		7.35657e-14	2.07711e-11	3.50028e-13	4.97783e-20	1.08886e-17	9.09953e-20	1.57277e-12	7.58463e-17	7.57552e-17	4.08532e-15	3.43443e-17	1.62697e-17	7.54587e-15
THS	0.103477	0.391021	-0.0393403	0.0275732	-0.0743089	0.14611	-0.0574109	-0.15375	0.105468	0.0174323	0.138822	-0.494881	0.445595	0.44859	0.226197	0.718336	0.491186	0.445988	0.52425	0.636609	0.357532	0.578338		3.67365e-18	7.70385e-06	6.80219e-39	1.36674e-47	3.66398e-34	3.94389e-21	3.80599e-35	1.43272e-24	5.0281e-33	2.16609e-31	2.08013e-36	6.21828e-29
11OPT	0.0512345	0.305427	-0.0928299	-0.0312486	0.00790133	0.127826	0.00164883	-0.040114	0.0592056	-0.248903	-0.124737	-0.895159	0.482996	0.426006	0.325956	0.531194	0.425715	0.561991	0.561289	0.513332	0.35089	0.528961	0.64866		0.0043139	7.95377e-14	1.50943e-10	6.93679e-10	0.000450727	3.18221e-10	4.2075e-09	1.55243e-10	1.94302e-10	3.71658e-11	3.0928e-10
d5PT	0.131417	0.171626	0.110888	0.182881	0.0614548	0.183048	0.125137	0.126757	0.111785	0.208325	0.236027	-0.214798	0.703103	0.62824	0.777694	0.448307	0.30239	0.730542	0.663738	0.560775	0.91284	0.565512	0.373928	0.251218		1.46504e-07	6.28256e-10	7.19882e-18	5.19523e-07	2.37791e-06	2.59169e-05	1.69034e-05	6.17322e-06	7.09325e-07	1.74308e-11
THE	0.000350621	0.341193	0.0133228	0.0720828	-0.0420079	0.0233938	0.0605594	-0.0289088	0.0500636	-0.018235	0.0641715	-0.356065	0.596703	0.56733	0.265499	0.856629	0.596593	0.431076	0.537941	0.763368	0.392712	0.67401	0.839375	0.57767	0.430525		2.25494e-48	3.82547e-33	4.33878e-20	1.31511e-71	4.59428e-43	1.89869e-64	4.51989e-64	8.12273e-51	8.36382e-31
THA	0.00170928	0.366031	0.0813336	0.143354	-0.0258739	0.137832	0.047725	-0.0616165	0.0992492	0.0984942	0.1758	-0.309937	0.558826	0.549539	0.273209	0.771702	0.579936	0.472104	0.595199	0.743553	0.459184	0.641712	0.881616	0.509324	0.494276	0.884808		1.49796e-51	8.27407e-31	1.18089e-41	1.14973e-30	4.32358e-38	9.11226e-40	1.12432e-42	2.66662e-31
THB	-0.11095	0.230083	0.0916315	0.1973	0.0702506	0.207368	0.0256439	-0.00496531	0.0676053	0.088752	0.1687	-0.339584	0.646669	0.588316	0.384536	0.732306	0.521681	0.558044	0.664686	0.767996	0.616941	0.670534	0.809787	0.493196	0.644406	0.802707	0.897052		9.38365e-30	3.18884e-31	1.06332e-25	1.1085e-26	1.56895e-27	5.3176e-33	1.27673e-28
aTHB	-0.0844339	0.178372	0.047853	0.118744	0.0638566	0.16928	-0.01967	-0.0155707	0.101032	0.0907038	0.148376	-0.190861	0.510499	0.337252	0.125653	0.744422	0.352167	0.325896	0.40938	0.641716	0.317925	0.552388	0.68812	0.301321	0.413656	0.674826	0.784944	0.77622		1.63497e-20	1.12217e-29	1.74874e-16	2.52687e-17	2.29236e-22	1.73115e-20
THF	-0.0692038	0.289329	0.0267035	0.127941	0.00130032	0.118069	0.00450736	-0.0472204	0.0412746	-0.0142745	0.094634	-0.271744	0.513158	0.492218	0.230561	0.839549	0.513075	0.341929	0.451326	0.727391	0.354423	0.628815	0.816357	0.5015	0.391983	0.948175	0.854411	0.788196	0.680326		8.12273e-51	5.82223e-68	5.94457e-58	3.02513e-64	1.91159e-25
aTHF	-0.203579	0.199332	0.100111	0.135532	0.114959	0.202126	0.0391163	-0.0988646	-0.01565	-0.0624596	0.0270478	-0.278803	0.514239	0.353864	0.174017	0.871416	0.520797	0.323055	0.375961	0.693039	0.307732	0.628879	0.727199	0.473457	0.3542	0.861574	0.783682	0.739122	0.775518	0.894227		2.82276e-43	3.11778e-38	5.06279e-52	7.14295e-23
aCL	-0.0405186	0.337667	0.076664	0.155175	0.0458178	0.183272	0.0745206	-0.0640575	0.033427	0.00504341	0.10248	-0.291521	0.484666	0.436777	0.196817	0.82066	0.522894	0.335265	0.41488	0.689352	0.318068	0.600749	0.801789	0.508991	0.361351	0.933845	0.834657	0.748759	0.623163	0.941284	0.862677		2.51559e-56	9.07981e-72	1.96625e-21
bCL	0.0275018	0.368966	-0.0332244	0.0214228	-0.128086	0.0174233	0.0261493	0.0546101	0.0467417	0.0352263	0.101965	-0.287163	0.58325	0.560937	0.218604	0.8282	0.566294	0.365171	0.511439	0.737244	0.369432	0.634134	0.789628	0.50666	0.377547	0.932633	0.844426	0.756685	0.636159	0.917374	0.835556	0.912474		2.32949e-49	5.5854e-24
aC	-0.0871293	0.275355	0.0796558	0.179661	0.098808	0.263996	0.0217331	-0.0917332	-0.00213614	-0.0316936	0.0745824	-0.334423	0.502645	0.418262	0.265623	0.841786	0.494394	0.415549	0.436769	0.704048	0.367959	0.639128	0.824483	0.523427	0.409331	0.894113	0.859617	0.801536	0.702982	0.933192	0.898805	0.948949	0.888681		2.80341e-25
F	0.0222654	0.162982	0.0188109	0.128249	-0.018387	0.152711	-0.0621595	-0.136248	-0.00868954	0.0173956	0.074551	-0.379627	0.603603	0.565814	0.35402	0.753371	0.47147	0.494855	0.612606	0.66438	0.499387	0.596092	0.769235	0.501843	0.530632	0.78483	0.788865	0.766454	0.679961	0.736384	0.708896	0.691912	0.721013	0.734684

[truncated: 1 more sheets: Supplement Table S2 U18 woman]
